# Supplementary material for: Influence of the organic cation on the formation of hexahalotechnetates: X-ray, thermal and comparative analyses of non-covalent interactions
Source: Royal Society of Chemistry journal article supplement (doi:10.1039/d3dt03235c), 2023-01-01
Supplement: d3dt03235c1.pdf [file d3dt03235c1.pdf]

## Supporting Information

### **Influence of organic cation on the formation of hexahalotechnetates: X-ray, thermal and comparative analysis of non-valent interactions**

Anton P. Novikov<sup>a</sup>, Karim A. Zagidullin<sup>a\*</sup>, Mikhail A. Volkov<sup>a</sup>,  
Konstantin E. German<sup>a</sup>, Iurii M. Nevolin<sup>a</sup>, Mikhail S. Grigoriev<sup>a</sup>

<sup>a</sup>. *Frumkin Institute of Physical Chemistry and Electrochemistry, Russian Academy of Sciences, Russian Federation, Moscow, 31 Bldg 4, Leninsky prosp, 119071*

\* zagidullink@Yandex.ru

## Table of contents

|                                                                                              |    |
|----------------------------------------------------------------------------------------------|----|
| Table of contents .....                                                                      | 2  |
| 1. Experimental methods .....                                                                | 3  |
| 1.1 Electron absorption spectroscopy and IR-spectroscopy of 1 and 2.....                     | 3  |
| 1.2 Thermal analysis .....                                                                   | 3  |
| 1.3 XAFS spectroscopy of 13.....                                                             | 3  |
| 1.4 Powder X-ray diffraction (PXRD).....                                                     | 3  |
| 1.5 Measurements of technetium concentration in saturated solutions. Beta spectrometry ..... | 3  |
| 2. Crystal structure data.....                                                               | 4  |
| 3. Solubility of some $\text{Tc}(\text{Hal})_6^{2-}$ compounds .....                         | 22 |
| 4. Thermal analysis.....                                                                     | 23 |
| 5. X-ray phase analysis of thermolysis products and some initial substances .....            | 26 |
| 6. Hirshfeld surface analysis .....                                                          | 30 |

## **1. Experimental methods**

### ***1.1 Electron absorption spectroscopy and IR-spectroscopy of 1 and 2***

UV-Vis spectroscopy of a stock solution of compound 4 was carried out on an Agilent Cary 100 spectrophotometer in the range of 200-800 nm. A quartz cell l = 1.01 mm was used.

Infrared spectroscopy was carried out on a Nicolet Magna 550 FTIR instrument.

### ***1.2 Thermal analysis***

We performed thermal gravimetry with simultaneous differential thermal analysis (TG-DTA) using a Netzsch STA Jupiter 449 F3 thermoanalytical complex. Heating was carried out at a rate of 10 °C/min in the temperature range 40–1000 °C. Al<sub>2</sub>O<sub>3</sub> crucibles and W-Re sample carrier were used; the atmosphere was the Ar-1.5% H<sub>2</sub> mixture with a purity of  $\omega(\text{Ar} + \text{H}_2) = 99.999\%$ .

### ***1.3 XAFS spectroscopy of 13***

The X-ray absorption spectra (EXAFS, XANES) on the Tc *K*-edge were taken with the Structural Materials Science Station (Russian Research Centre Kurchatov Institute) in the transmission geometry using a Si(111) monoblock monochromator with a slit and two ionization chambers filled with an argon–xenon mixture. The EXAFS spectra were processed with Athena and Artemis programs from the IFEFFIT package<sup>1</sup>. The multisphere fitting of normalized EXAFS curves  $\chi(k)$  was performed in the photoelectron wavenumber range  $k$  4.0–15.0 Å<sup>-1</sup> with the *k*<sup>3</sup> weight scheme using the photoelectron theoretical phases and scattering amplitudes calculated with FEFF program<sup>2</sup>. As reference sample we used a polycrystalline powder of technetium metal.

### ***1.4 Powder X-ray diffraction (PXRD)***

PXRD measurements were performed using a Panalytical Aeris X-ray diffractometer with Cu K $\alpha$  radiation and PIXcel3D detector. Diffraction patterns were recorded with a step of  $2\theta = 0.011^\circ$  in the Bragg-Brentano geometry. Powders were placed on a zero-background silicon holder and covered with shellac.

### ***1.5 Measurements of technetium concentration in saturated solutions. Beta spectrometry***

The concentration of technetium in saturated solutions of various hexahalogenotechnetates was assessed by adding a sample of the dry compound into a 1.5 ml glass vial with 500  $\mu$ l of solvent, which was placed in a thermostat. An aliquot was taken to determine the activity of the solution for those samples where a precipitate of the original substance remained at the bottom of the vials. If the precipitate was completely dissolved in the vial, then an additional portion of

the dry compound was added. Measurements of the activity of solutions were carried out after keeping the solvent above the sediment for at least 7 days. The experimental results are given in the SI Table S36

Activity measurements in solutions were carried out on a Tri-Carb 3180 TR/SL instrument (Perkin Elmer) using the liquid scintillation spectrometry (LSC) method. An aliquot of the analyzed solvent was mixed with HiSafe-3 liquid scintillator (Perkin Elmer) in a ratio of 1:20. The activity of technetium was taken to be 635Bk/ $\mu\text{g}^{43}$ .

## 2. Crystal structure data

The crystal structures of all synthesized substances were determined by X-ray structural analysis using an automatic four-circle area-detector diffractometer Bruker KAPPA APEX II with MoK $\alpha$  radiation. The cell parameters were refined over the entire data set together with data reduction by using SAINT-Plus software<sup>3</sup>. Absorption corrections were introduced using the SADABS program<sup>4</sup>. The structures were solved by using the SHELXT-2018/2 program<sup>5</sup> and refined by full-matrix least squares on  $F^2$  in the anisotropic approximation for all non-hydrogen atoms (SHELXL-2018/3<sup>6</sup>). The C-H in all structures and N-H in **5** bonded hydrogen atoms were placed in geometrically calculated positions and refined in an idealized geometry with isotropic temperature factors equal to  $1.2U_{eq}(\text{C}, \text{N})$  for CH-groups, and  $1.5U_{eq}(\text{C})$  for CH<sub>3</sub>-groups. N-H and O-H bonded hydrogen atoms were objectively located from the difference Fourier synthesis and refined with isotropic temperature factors equal to  $1.2U_{eq}(\text{N})$  and  $1.5 U_{eq}(\text{O})$ .

Crystal data, data collection, and structure refinement details are summarized in Table S1. Tables S2–S32 represent all other crystallographic parameters of structures **1** – **8**. The atomic coordinates were deposited at the Cambridge Crystallographic Data Centre, CCDC № 2298414-2298421 for **1-8**.

**Table S1.** Crystal data and structure refinement for **1-8**.

| Identification code | <b>1</b>                                                                               | <b>2</b>                                                                               | <b>3</b>                                                                                                  | <b>4</b>                                                                                                  | <b>5</b>                                                                                              | <b>6</b>                                                                               | <b>7</b>                                                               | <b>8</b>                                                               |
|---------------------|----------------------------------------------------------------------------------------|----------------------------------------------------------------------------------------|-----------------------------------------------------------------------------------------------------------|-----------------------------------------------------------------------------------------------------------|-------------------------------------------------------------------------------------------------------|----------------------------------------------------------------------------------------|------------------------------------------------------------------------|------------------------------------------------------------------------|
| CCDC number         | <b>22984<br/>20</b>                                                                    | <b>22984<br/>14</b>                                                                    | <b>22984<br/>17</b>                                                                                       | <b>22984<br/>15</b>                                                                                       | <b>22984<br/>21</b>                                                                                   | <b>22984<br/>18</b>                                                                    | <b>22984<br/>19</b>                                                    | <b>22984<br/>16</b>                                                    |
| Empirical formula   | C <sub>16</sub> H <sub>24</sub><br>Br <sub>6</sub> N <sub>8</sub><br>O <sub>5</sub> Tc | C <sub>16</sub> H <sub>22</sub><br>Cl <sub>6</sub> N <sub>8</sub><br>O <sub>4</sub> Tc | C <sub>28</sub> H <sub>32</sub><br>Cl <sub>8</sub> N <sub>4</sub><br>O <sub>4</sub> S <sub>4</sub> T<br>c | C <sub>14</sub> H <sub>16</sub><br>Cl <sub>6</sub> N <sub>2</sub><br>O <sub>2</sub> S <sub>2</sub> T<br>c | C <sub>48</sub> H <sub>66</sub><br>Cl <sub>20</sub> N <sub>2</sub><br>4O <sub>3</sub> Tc <sub>2</sub> | C <sub>12</sub> H <sub>14</sub><br>Br <sub>6</sub> N <sub>4</sub><br>O <sub>2</sub> Tc | C <sub>8</sub> H <sub>24</sub><br>Br <sub>6</sub> N <sub>2</sub><br>Tc | C <sub>8</sub> H <sub>24</sub><br>Cl <sub>6</sub> N <sub>2</sub><br>Tc |
| Formula weight      | 985.89                                                                                 | 701.11                                                                                 | 998.41                                                                                                    | 619.11                                                                                                    | 1932.2<br>4                                                                                           | 823.73                                                                                 | 725.75                                                                 | 458.99                                                                 |
| Temperature/K       | 100(2)                                                                                 | 100(2)                                                                                 | 100(2)                                                                                                    | 100(2)                                                                                                    | 100(2)                                                                                                | 100(2)                                                                                 | 100(2)                                                                 | 100(2)                                                                 |
| Crystal             | monoc                                                                                  | triclini                                                                               | triclini                                                                                                  | triclini                                                                                                  | monoc                                                                                                 | monoc                                                                                  | monoc                                                                  | monoc                                                                  |

| system                                             | linic                                                     | c                                                         | c                                                        | c                                                        | linic                                                     | linic                                                    | linic                                                     | linic                                                     |
|----------------------------------------------------|-----------------------------------------------------------|-----------------------------------------------------------|----------------------------------------------------------|----------------------------------------------------------|-----------------------------------------------------------|----------------------------------------------------------|-----------------------------------------------------------|-----------------------------------------------------------|
| Space group                                        | P2 <sub>1</sub> /n                                        | P-1                                                       | P-1                                                      | P-1                                                      | P2 <sub>1</sub> /c                                        | P2 <sub>1</sub> /n                                       | P2 <sub>1</sub> /n                                        | P2 <sub>1</sub> /n                                        |
| a/Å                                                | 13.428<br>(2)                                             | 7.898(<br>3)                                              | 7.1584<br>(4)                                            | 7.2136<br>(5)                                            | 28.562<br>3(9)                                            | 8.3100<br>(11)                                           | 9.1485<br>(5)                                             | 8.8583<br>(7)                                             |
| b/Å                                                | 14.292<br>(3)                                             | 8.106(<br>3)                                              | 9.3884<br>(5)                                            | 8.0612<br>(6)                                            | 12.861<br>6(4)                                            | 10.801<br>3(15)                                          | 10.749<br>7(6)                                            | 10.434<br>0(8)                                            |
| c/Å                                                | 15.242<br>(3)                                             | 10.452<br>(4)                                             | 15.484<br>6(8)                                           | 9.8742<br>(7)                                            | 22.092<br>3(7)                                            | 11.899<br>2(16)                                          | 9.9767<br>(5)                                             | 9.6725<br>(8)                                             |
| $\alpha$ /°                                        | 90                                                        | 96.572<br>(16)                                            | 76.369<br>(2)                                            | 98.062<br>(3)                                            | 90                                                        | 90                                                       | 90                                                        | 90                                                        |
| $\beta$ /°                                         | 106.82<br>3(7)                                            | 91.809<br>(15)                                            | 79.704<br>(2)                                            | 100.83<br>0(3)                                           | 108.19<br>10(10)                                          | 101.54<br>9(6)                                           | 92.386<br>(2)                                             | 92.915<br>(3)                                             |
| $\gamma$ /°                                        | 90                                                        | 112.38<br>2(14)                                           | 81.477<br>(2)                                            | 92.071<br>(3)                                            | 90                                                        | 90                                                       | 90                                                        | 90                                                        |
| Volume/<br>Å <sup>3</sup>                          | 2800.0<br>(9)                                             | 612.7(<br>4)                                              | 988.92<br>(9)                                            | 557.23<br>(7)                                            | 7710.1<br>(4)                                             | 1046.4<br>(2)                                            | 980.29<br>(9)                                             | 892.85<br>(12)                                            |
| Z                                                  | 4                                                         | 1                                                         | 1                                                        | 1                                                        | 4                                                         | 2                                                        | 2                                                         | 2                                                         |
| $\rho_{\text{calc}}$ g/cm <sub>3</sub>             | 2.339                                                     | 1.900                                                     | 1.676                                                    | 1.845                                                    | 1.665                                                     | 2.614                                                    | 2.459                                                     | 1.707                                                     |
| $\mu$ /mm <sup>-1</sup>                            | 9.120                                                     | 1.285                                                     | 1.155                                                    | 1.566                                                    | 1.108                                                     | 12.158                                                   | 12.948                                                    | 1.688                                                     |
| F(000)                                             | 1876.0                                                    | 351.0                                                     | 503.0                                                    | 307.0                                                    | 3888.0                                                    | 766.0                                                    | 678.0                                                     | 462.0                                                     |
| Crystal size/mm <sup>3</sup>                       | 0.1 ×<br>0.04 ×<br>0.03                                   | 0.1 ×<br>0.08 ×<br>0.05                                   | 0.2 ×<br>0.1 ×<br>0.07                                   | 0.13 ×<br>0.12 ×<br>0.04                                 | 0.3 ×<br>0.26 ×<br>0.2                                    | 0.12 ×<br>0.1 ×<br>0.09                                  | 0.28 ×<br>0.2 ×<br>0.14                                   | 0.22 ×<br>0.18 ×<br>0.17                                  |
| Radiation                                          | MoK $\alpha$<br>( $\lambda$ =<br>0.7107<br>3)             | MoK $\alpha$<br>( $\lambda$ =<br>0.7107<br>3)             | MoK $\alpha$<br>( $\lambda$ =<br>0.7107<br>3)            | MoK $\alpha$<br>( $\lambda$ =<br>0.7107<br>3)            | MoK $\alpha$<br>( $\lambda$ =<br>0.7107<br>3)             | MoK $\alpha$<br>( $\lambda$ =<br>0.7107<br>3)            | MoK $\alpha$<br>( $\lambda$ =<br>0.7107<br>3)             | MoK $\alpha$<br>( $\lambda$ =<br>0.7107<br>3)             |
| 2 $\Theta$ range<br>for data<br>collection/<br>n/° | 8.384<br>to<br>59.998                                     | 8.964<br>to<br>59.998                                     | 8.178<br>to<br>59.99                                     | 8.406<br>to<br>59.998                                    | 8.296<br>to<br>69.992                                     | 8.318<br>to<br>59.996                                    | 8.178<br>to<br>59.992                                     | 6.038<br>to<br>60.398                                     |
| Index<br>ranges                                    | -18 ≤ h<br>≤ 18, -<br>20 ≤ k<br>≤ 20, -<br>21 ≤ l<br>≤ 21 | -11 ≤ h<br>≤ 11, -<br>11 ≤ k<br>≤ 11, -<br>14 ≤ l<br>≤ 14 | -9 ≤ h<br>≤ 10, -<br>13 ≤ k<br>≤ 13, -<br>21 ≤ l<br>≤ 21 | -10 ≤ h<br>≤ 9, -<br>11 ≤ k<br>≤ 11, -<br>13 ≤ l<br>≤ 13 | -45 ≤ h<br>≤ 45, -<br>20 ≤ k<br>≤ 20, -<br>35 ≤ l<br>≤ 34 | -11 ≤ h<br>≤ 9, -<br>15 ≤ k<br>≤ 15, -<br>16 ≤ l<br>≤ 16 | -12 ≤ h<br>≤ 12, -<br>14 ≤ k<br>≤ 15, -<br>14 ≤ l<br>≤ 14 | -12 ≤ h<br>≤ 12, -<br>14 ≤ k<br>≤ 14, -<br>13 ≤ l<br>≤ 13 |
| Reflections<br>collected                           | 43761                                                     | 10321                                                     | 19290                                                    | 11493                                                    | 20507<br>0                                                | 18373                                                    | 20326                                                     | 15015                                                     |
| Independent                                        | 8150<br>[R <sub>int</sub> =                               | 3569<br>[R <sub>int</sub> =                               | 5751<br>[R <sub>int</sub> =                              | 3237<br>[R <sub>int</sub> =                              | 33002<br>[R <sub>int</sub> =                              | 3039<br>[R <sub>int</sub> =                              | 2839<br>[R <sub>int</sub> =                               | 2620<br>[R <sub>int</sub> =                               |

|                                                                           |                                                                |                                                                |                                                                |                                                                |                                                                |                                                                |                                                                |                                                                |
|---------------------------------------------------------------------------|----------------------------------------------------------------|----------------------------------------------------------------|----------------------------------------------------------------|----------------------------------------------------------------|----------------------------------------------------------------|----------------------------------------------------------------|----------------------------------------------------------------|----------------------------------------------------------------|
| reflections                                                               | 0.1817<br>,<br>R <sub>sigma</sub><br>=<br>0.1617<br>]          | 0.0950<br>,<br>R <sub>sigma</sub><br>=<br>0.1230<br>]          | 0.0267<br>,<br>R <sub>sigma</sub><br>=<br>0.0299<br>]          | 0.0397<br>,<br>R <sub>sigma</sub><br>=<br>0.0477<br>]          | 0.0529<br>,<br>R <sub>sigma</sub><br>=<br>0.0453<br>]          | 0.1211<br>,<br>R <sub>sigma</sub><br>=<br>0.1010<br>]          | 0.0448<br>,<br>R <sub>sigma</sub><br>=<br>0.0300<br>]          | 0.0512<br>,<br>R <sub>sigma</sub><br>=<br>0.0372<br>]          |
| Data/restraints/parameters                                                | 8150/4<br>/326                                                 | 3569/0<br>/166                                                 | 5751/0<br>/241                                                 | 3237/4<br>/133                                                 | 33002/<br>9/892                                                | 3039/3<br>/124                                                 | 2839/0<br>/85                                                  | 2620/0<br>/127                                                 |
| Goodness-of-fit on F <sup>2</sup>                                         | 0.986                                                          | 0.969                                                          | 1.037                                                          | 1.020                                                          | 1.020                                                          | 0.997                                                          | 1.006                                                          | 1.038                                                          |
| Final R indexes [I>=2σ (I)]                                               | R <sub>1</sub> =<br>0.0610<br>,<br>wR <sub>2</sub> =<br>0.1058 | R <sub>1</sub> =<br>0.0585<br>,<br>wR <sub>2</sub> =<br>0.1238 | R <sub>1</sub> =<br>0.0230<br>,<br>wR <sub>2</sub> =<br>0.0493 | R <sub>1</sub> =<br>0.0364<br>,<br>wR <sub>2</sub> =<br>0.0760 | R <sub>1</sub> =<br>0.0358<br>,<br>wR <sub>2</sub> =<br>0.0640 | R <sub>1</sub> =<br>0.0454<br>,<br>wR <sub>2</sub> =<br>0.0649 | R <sub>1</sub> =<br>0.0218<br>,<br>wR <sub>2</sub> =<br>0.0406 | R <sub>1</sub> =<br>0.0231<br>,<br>wR <sub>2</sub> =<br>0.0450 |
| Final R indexes [all data]                                                | R <sub>1</sub> =<br>0.1664<br>,<br>wR <sub>2</sub> =<br>0.1380 | R <sub>1</sub> =<br>0.0951<br>,<br>wR <sub>2</sub> =<br>0.1418 | R <sub>1</sub> =<br>0.0291<br>,<br>wR <sub>2</sub> =<br>0.0516 | R <sub>1</sub> =<br>0.0519<br>,<br>wR <sub>2</sub> =<br>0.0827 | R <sub>1</sub> =<br>0.0643<br>,<br>wR <sub>2</sub> =<br>0.0735 | R <sub>1</sub> =<br>0.1057<br>,<br>wR <sub>2</sub> =<br>0.0792 | R <sub>1</sub> =<br>0.0305<br>,<br>wR <sub>2</sub> =<br>0.0425 | R <sub>1</sub> =<br>0.0321<br>,<br>wR <sub>2</sub> =<br>0.0485 |
| Largest diff. peak/hole / e <sup>-</sup> / e <sup>+</sup> Å <sup>-3</sup> | 1.54/-<br>1.92                                                 | 1.21/-<br>2.62                                                 | 0.41/-<br>0.29                                                 | 0.78/-<br>0.56                                                 | 0.69/-<br>0.60                                                 | 0.98/-<br>1.28                                                 | 0.55/-<br>0.59                                                 | 0.43/-<br>0.38                                                 |

**Table S2.** Bond Lengths for **1**.

| Atom | Atom | Length/Å   | Atom | Atom | Length/Å  |
|------|------|------------|------|------|-----------|
| Tc1  | Br1  | 2.4871(12) | N1   | C2   | 1.414(10) |
| Tc1  | Br2  | 2.5132(11) | N1   | C10  | 1.489(10) |
| Tc1  | Br3  | 2.5334(12) | N3   | C12  | 1.469(10) |
| Tc1  | Br4  | 2.5034(12) | N3   | C4   | 1.346(9)  |
| Tc1  | Br5  | 2.5159(12) | N3   | C2   | 1.373(10) |
| Tc1  | Br6  | 2.5038(12) | N23  | C24  | 1.356(10) |
| O13  | C6   | 1.230(9)   | N23  | C22  | 1.387(10) |
| O31  | C22  | 1.213(10)  | N23  | C32  | 1.475(10) |
| O11  | C2   | 1.221(9)   | N9   | C4   | 1.361(10) |
| N7   | C5   | 1.380(9)   | N9   | C8   | 1.341(11) |
| N7   | C14  | 1.444(10)  | N27  | C25  | 1.380(9)  |
| N7   | C8   | 1.330(11)  | N27  | C28  | 1.319(10) |
| N21  | C26  | 1.406(10)  | N27  | C34  | 1.479(10) |
| N21  | C22  | 1.384(11)  | O33  | C26  | 1.244(10) |

|     |     |           |     |     |           |
|-----|-----|-----------|-----|-----|-----------|
| N21 | C30 | 1.477(10) | C5  | C6  | 1.419(11) |
| N29 | C24 | 1.369(9)  | C5  | C4  | 1.354(11) |
| N29 | C28 | 1.334(10) | C25 | C24 | 1.354(11) |
| N1  | C6  | 1.405(10) | C25 | C26 | 1.405(11) |

**Table S3.** Bond Angles for **1**.

| Atom | Atom | Atom | Angle/°   | Atom | Atom | Atom | Angle/°  |
|------|------|------|-----------|------|------|------|----------|
| Br1  | Tc1  | Br2  | 89.47(4)  | C8   | N9   | C4   | 107.8(8) |
| Br1  | Tc1  | Br3  | 89.20(4)  | C25  | N27  | C34  | 127.7(7) |
| Br1  | Tc1  | Br4  | 89.85(4)  | C28  | N27  | C25  | 107.2(7) |
| Br1  | Tc1  | Br5  | 90.18(4)  | C28  | N27  | C34  | 125.1(7) |
| Br1  | Tc1  | Br6  | 179.75(5) | N7   | C5   | C6   | 129.6(8) |
| Br2  | Tc1  | Br3  | 88.63(4)  | C4   | C5   | N7   | 107.7(7) |
| Br2  | Tc1  | Br5  | 90.19(4)  | C4   | C5   | C6   | 122.7(7) |
| Br4  | Tc1  | Br2  | 178.72(4) | O13  | C6   | N1   | 120.7(8) |
| Br4  | Tc1  | Br3  | 90.28(4)  | O13  | C6   | C5   | 127.9(8) |
| Br4  | Tc1  | Br5  | 90.90(4)  | N1   | C6   | C5   | 111.5(7) |
| Br4  | Tc1  | Br6  | 90.37(4)  | N27  | C25  | C26  | 131.9(8) |
| Br5  | Tc1  | Br3  | 178.67(4) | C24  | C25  | N27  | 107.7(7) |
| Br6  | Tc1  | Br2  | 90.31(4)  | C24  | C25  | C26  | 120.4(7) |
| Br6  | Tc1  | Br3  | 90.68(4)  | N23  | C24  | N29  | 127.8(8) |
| Br6  | Tc1  | Br5  | 89.93(4)  | C25  | C24  | N29  | 107.3(7) |
| C5   | N7   | C14  | 127.1(8)  | C25  | C24  | N23  | 124.9(7) |
| C8   | N7   | C5   | 107.1(7)  | O33  | C26  | N21  | 120.3(7) |
| C8   | N7   | C14  | 125.7(8)  | O33  | C26  | C25  | 126.2(8) |
| C26  | N21  | C30  | 116.5(7)  | C25  | C26  | N21  | 113.4(8) |
| C22  | N21  | C26  | 126.1(7)  | N3   | C4   | N9   | 129.0(8) |
| C22  | N21  | C30  | 117.4(7)  | N3   | C4   | C5   | 123.4(7) |
| C28  | N29  | C24  | 107.5(7)  | C5   | C4   | N9   | 107.6(7) |
| C6   | N1   | C2   | 126.3(7)  | O11  | C2   | N1   | 121.2(8) |
| C6   | N1   | C10  | 119.0(7)  | O11  | C2   | N3   | 122.1(8) |
| C2   | N1   | C10  | 114.6(7)  | N3   | C2   | N1   | 116.6(7) |
| C4   | N3   | C12  | 119.5(7)  | N27  | C28  | N29  | 110.4(7) |
| C4   | N3   | C2   | 119.4(7)  | O31  | C22  | N21  | 121.5(8) |
| C2   | N3   | C12  | 120.7(7)  | O31  | C22  | N23  | 121.5(8) |
| C24  | N23  | C22  | 118.0(7)  | N21  | C22  | N23  | 117.0(8) |
| C24  | N23  | C32  | 121.0(6)  | N7   | C8   | N9   | 109.8(7) |
| C22  | N23  | C32  | 120.5(7)  |      |      |      |          |

**Table S4.** Hydrogen Bonds for **1**.

| D   | H   | A                | d(D-H)/Å | d(H-A)/Å | d(D-A)/Å  | D-H-A/° |
|-----|-----|------------------|----------|----------|-----------|---------|
| N29 | H29 | O13 <sup>1</sup> | 0.87(2)  | 1.93(4)  | 2.716(9)  | 150(7)  |
| O1  | H1B | O1 <sup>2</sup>  | 0.84(2)  | 2.50(8)  | 3.134(15) | 133(9)  |

|     |      |                  |         |         |           |        |
|-----|------|------------------|---------|---------|-----------|--------|
| N9  | H9   | O1               | 0.87(2) | 1.94(4) | 2.754(10) | 154(7) |
| C14 | H14B | O31              | 0.98    | 2.47    | 3.216(11) | 132.2  |
| C28 | H28  | O31 <sup>3</sup> | 0.95    | 2.44    | 3.119(10) | 128.6  |
| C28 | H28  | O11 <sup>4</sup> | 0.95    | 2.40    | 3.189(9)  | 140.9  |
| C34 | H34B | O31 <sup>3</sup> | 0.98    | 2.51    | 3.343(11) | 142.4  |
| C8  | H8   | O11 <sup>5</sup> | 0.95    | 2.19    | 3.066(10) | 152.3  |

<sup>1</sup>2-X,1-Y,1-Z; <sup>2</sup>2-X,1-Y,2-Z; <sup>3</sup>5/2-X,1/2+Y,3/2-Z; <sup>4</sup>1+X,+Y,+Z; <sup>5</sup>3/2-X,-1/2+Y,3/2-Z

**Table S4.** Torsion Angles for **1**.

| <b>A</b> | <b>B</b> | <b>C</b> | <b>D</b> | <b>Angle/°</b> | <b>A</b> | <b>B</b> | <b>C</b> | <b>D</b> | <b>Angle/°</b> |
|----------|----------|----------|----------|----------------|----------|----------|----------|----------|----------------|
| N7       | C5       | C6       | O13      | -0.7(13)       | C2       | N1       | C6       | C5       | 0.7(10)        |
| N7       | C5       | C6       | N1       | 178.1(7)       | C2       | N3       | C4       | N9       | -179.4(7)      |
| N7       | C5       | C4       | N3       | -178.4(7)      | C2       | N3       | C4       | C5       | 0.1(11)        |
| N7       | C5       | C4       | N9       | 1.2(9)         | C14      | N7       | C5       | C6       | 4.0(13)        |
| N27      | C25      | C24      | N29      | -1.5(8)        | C14      | N7       | C5       | C4       | -176.4(7)      |
| N27      | C25      | C24      | N23      | 179.0(7)       | C14      | N7       | C8       | N9       | 175.7(7)       |
| N27      | C25      | C26      | N21      | 178.4(7)       | C28      | N29      | C24      | N23      | -178.8(7)      |
| N27      | C25      | C26      | O33      | 1.1(14)        | C28      | N29      | C24      | C25      | 1.8(8)         |
| C5       | N7       | C8       | N9       | -0.2(9)        | C28      | N27      | C25      | C24      | 0.7(8)         |
| C12      | N3       | C4       | N9       | -6.3(11)       | C28      | N27      | C25      | C26      | -179.4(8)      |
| C12      | N3       | C4       | C5       | 173.2(7)       | C22      | N21      | C26      | O33      | 179.7(8)       |
| C12      | N3       | C2       | O11      | 5.2(11)        | C22      | N21      | C26      | C25      | 2.2(11)        |
| C12      | N3       | C2       | N1       | -173.9(6)      | C22      | N23      | C24      | N29      | -176.0(7)      |
| C6       | N1       | C2       | O11      | -178.6(7)      | C22      | N23      | C24      | C25      | 3.4(11)        |
| C6       | N1       | C2       | N3       | 0.4(10)        | C34      | N27      | C25      | C24      | -178.8(7)      |
| C6       | C5       | C4       | N3       | 1.2(12)        | C34      | N27      | C25      | C26      | 1.1(13)        |
| C6       | C5       | C4       | N9       | -179.2(7)      | C34      | N27      | C28      | N29      | 180.0(7)       |
| C25      | N27      | C28      | N29      | 0.4(8)         | C30      | N21      | C26      | O33      | -1.1(11)       |
| C24      | N29      | C28      | N27      | -1.4(8)        | C30      | N21      | C26      | C25      | -178.5(7)      |
| C24      | N23      | C22      | O31      | 177.1(7)       | C30      | N21      | C22      | O31      | 0.9(12)        |
| C24      | N23      | C22      | N21      | -2.8(10)       | C30      | N21      | C22      | N23      | -179.1(7)      |
| C24      | C25      | C26      | N21      | -1.8(11)       | C8       | N7       | C5       | C6       | 179.8(8)       |
| C24      | C25      | C26      | O33      | -179.1(8)      | C8       | N7       | C5       | C4       | -0.6(9)        |
| C26      | N21      | C22      | O31      | -179.8(8)      | C8       | N9       | C4       | N3       | 178.3(7)       |
| C26      | N21      | C22      | N23      | 0.1(11)        | C8       | N9       | C4       | C5       | -1.3(9)        |
| C26      | C25      | C24      | N29      | 178.6(7)       | C32      | N23      | C24      | N29      | -3.8(11)       |
| C26      | C25      | C24      | N23      | -0.9(12)       | C32      | N23      | C24      | C25      | 175.6(7)       |
| C4       | N3       | C2       | O11      | 178.2(7)       | C32      | N23      | C22      | O31      | 4.8(12)        |
| C4       | N3       | C2       | N1       | -0.8(10)       | C32      | N23      | C22      | N21      | -175.1(7)      |
| C4       | N9       | C8       | N7       | 1.0(9)         | C10      | N1       | C6       | O13      | -3.7(10)       |
| C4       | C5       | C6       | O13      | 179.8(7)       | C10      | N1       | C6       | C5       | 177.4(6)       |



|    |    |    |     |          |  |     |    |    |     |           |
|----|----|----|-----|----------|--|-----|----|----|-----|-----------|
| C4 | C5 | C6 | N1  | -1.5(10) |  | C10 | N1 | C2 | O11 | 4.5(10)   |
| C2 | N1 | C6 | O13 | 179.6(7) |  | C10 | N1 | C2 | N3  | -176.4(6) |

**Table S5.** Bond Lengths for **2**.

| Atom | Atom             | Length/Å   | Atom | Atom | Length/Å |
|------|------------------|------------|------|------|----------|
| Tc1  | Cl3              | 2.3380(14) | N1   | C2   | 1.415(6) |
| Tc1  | Cl3 <sup>1</sup> | 2.3380(14) | N1   | C6   | 1.391(6) |
| Tc1  | Cl2 <sup>1</sup> | 2.3490(14) | N1   | C10  | 1.465(5) |
| Tc1  | Cl2              | 2.3490(14) | N9   | C4   | 1.367(5) |
| Tc1  | Cl1              | 2.3684(14) | N9   | C8   | 1.335(6) |
| Tc1  | Cl1 <sup>1</sup> | 2.3684(14) | N7   | C5   | 1.377(6) |
| O1   | C2               | 1.199(6)   | N7   | C8   | 1.336(6) |
| O2   | C6               | 1.219(5)   | N7   | C12  | 1.473(6) |
| N3   | C4               | 1.341(6)   | C4   | C5   | 1.363(6) |
| N3   | C2               | 1.390(5)   | C6   | C5   | 1.445(6) |
| N3   | C11              | 1.471(6)   |      |      |          |

<sup>1</sup>2-X,<sup>2</sup>-Y,<sup>1</sup>-Z

**Table S6.** Bond Angles for **2**.

| Atom             | Atom | Atom             | Angle/°   | Atom | Atom | Atom | Angle/°  |
|------------------|------|------------------|-----------|------|------|------|----------|
| Cl3              | Tc1  | Cl3 <sup>1</sup> | 180.0     | C6   | N1   | C2   | 127.1(4) |
| Cl3 <sup>1</sup> | Tc1  | Cl2              | 90.04(4)  | C6   | N1   | C10  | 116.5(4) |
| Cl3              | Tc1  | Cl2              | 89.96(4)  | C8   | N9   | C4   | 109.0(4) |
| Cl3 <sup>1</sup> | Tc1  | Cl2 <sup>1</sup> | 89.96(4)  | C5   | N7   | C12  | 126.6(4) |
| Cl3              | Tc1  | Cl2 <sup>1</sup> | 90.04(4)  | C8   | N7   | C5   | 107.7(4) |
| Cl3 <sup>1</sup> | Tc1  | Cl1              | 89.87(4)  | C8   | N7   | C12  | 125.6(4) |
| Cl3              | Tc1  | Cl1              | 90.13(4)  | N3   | C4   | N9   | 129.7(4) |
| Cl3              | Tc1  | Cl1 <sup>1</sup> | 89.87(4)  | N3   | C4   | C5   | 123.8(4) |
| Cl3 <sup>1</sup> | Tc1  | Cl1 <sup>1</sup> | 90.13(4)  | C5   | C4   | N9   | 106.5(4) |
| Cl2 <sup>1</sup> | Tc1  | Cl2              | 180.00(6) | O1   | C2   | N3   | 121.6(4) |
| Cl2 <sup>1</sup> | Tc1  | Cl1              | 90.73(4)  | O1   | C2   | N1   | 122.2(4) |
| Cl2              | Tc1  | Cl1              | 89.27(4)  | N3   | C2   | N1   | 116.3(4) |
| Cl2              | Tc1  | Cl1 <sup>1</sup> | 90.73(4)  | O2   | C6   | N1   | 122.1(4) |
| Cl2 <sup>1</sup> | Tc1  | Cl1 <sup>1</sup> | 89.27(4)  | O2   | C6   | C5   | 126.5(5) |
| Cl1              | Tc1  | Cl1 <sup>1</sup> | 180.0     | N1   | C6   | C5   | 111.4(4) |
| C4               | N3   | C2               | 119.3(4)  | N7   | C5   | C6   | 130.3(4) |
| C4               | N3   | C11              | 123.6(4)  | C4   | C5   | N7   | 107.8(4) |
| C2               | N3   | C11              | 117.1(4)  | C4   | C5   | C6   | 121.9(4) |
| C2               | N1   | C10              | 116.3(4)  | N9   | C8   | N7   | 108.9(4) |

<sup>1</sup>2-X,<sup>2</sup>-Y,<sup>1</sup>-Z

**Table S7.** Hydrogen Bonds for **2**.

| D   | H    | A               | d(D-H)/Å | d(H-A)/Å | d(D-A)/Å | D-H-A/° |
|-----|------|-----------------|----------|----------|----------|---------|
| N9  | H9   | C11             | 0.84(5)  | 2.45(5)  | 3.275(4) | 168(5)  |
| C10 | H10B | O1 <sup>1</sup> | 0.98     | 2.42     | 3.345(6) | 157.6   |

<sup>1</sup>1-X,-Y,2-Z

**Table S8.** Torsion Angles for 2.

| A  | B  | C  | D  | Angle/°   | A   | B  | C  | D  | Angle/°   |
|----|----|----|----|-----------|-----|----|----|----|-----------|
| O2 | C6 | C5 | N7 | -0.5(8)   | C5  | N7 | C8 | N9 | 0.3(5)    |
| O2 | C6 | C5 | C4 | 177.6(4)  | C8  | N9 | C4 | N3 | -178.3(4) |
| N3 | C4 | C5 | N7 | 178.6(4)  | C8  | N9 | C4 | C5 | 0.5(5)    |
| N3 | C4 | C5 | C6 | 0.1(7)    | C8  | N7 | C5 | C4 | 0.0(5)    |
| N1 | C6 | C5 | N7 | -179.6(4) | C8  | N7 | C5 | C6 | 178.3(4)  |
| N1 | C6 | C5 | C4 | -1.5(6)   | C11 | N3 | C4 | N9 | -0.3(7)   |
| N9 | C4 | C5 | N7 | -0.3(5)   | C11 | N3 | C4 | C5 | -178.9(4) |
| N9 | C4 | C5 | C6 | -178.8(4) | C11 | N3 | C2 | O1 | -1.5(6)   |
| C4 | N3 | C2 | O1 | 175.8(4)  | C11 | N3 | C2 | N1 | 176.6(4)  |
| C4 | N3 | C2 | N1 | -6.1(6)   | C12 | N7 | C5 | C4 | -179.8(4) |
| C4 | N9 | C8 | N7 | -0.5(5)   | C12 | N7 | C5 | C6 | -1.5(7)   |
| C2 | N3 | C4 | N9 | -177.5(4) | C12 | N7 | C8 | N9 | -179.8(4) |
| C2 | N3 | C4 | C5 | 3.9(6)    | C10 | N1 | C2 | O1 | 0.2(6)    |
| C2 | N1 | C6 | O2 | 179.7(4)  | C10 | N1 | C2 | N3 | -178.0(4) |
| C2 | N1 | C6 | C5 | -1.1(6)   | C10 | N1 | C6 | O2 | 2.6(6)    |
| C6 | N1 | C2 | O1 | -177.0(4) | C10 | N1 | C6 | C5 | -178.2(4) |
| C6 | N1 | C2 | N3 | 4.9(6)    |     |    |    |    |           |

**Table S9.** Bond Lengths for 3.

| Atom | Atom             | Length/Å   | Atom | Atom | Length/Å   |
|------|------------------|------------|------|------|------------|
| Tc1  | C11              | 2.3652(4)  | N11  | C19  | 1.3936(18) |
| Tc1  | C11 <sup>1</sup> | 2.3652(4)  | C9   | C8   | 1.397(2)   |
| Tc1  | C12 <sup>1</sup> | 2.3684(3)  | C9   | C4   | 1.3989(19) |
| Tc1  | C12              | 2.3684(3)  | C8   | C7   | 1.380(2)   |
| Tc1  | C13 <sup>1</sup> | 2.3574(3)  | C14  | C15  | 1.3951(19) |
| Tc1  | C13              | 2.3575(3)  | C14  | C19  | 1.3973(19) |
| S13  | C12              | 1.6990(16) | C15  | C16  | 1.387(2)   |
| S13  | C14              | 1.7466(14) | C16  | C17  | 1.406(2)   |
| S3   | C4               | 1.7441(15) | C17  | C18  | 1.380(2)   |
| S3   | C2               | 1.6938(16) | C5   | C4   | 1.392(2)   |
| N1   | C9               | 1.3891(19) | C5   | C6   | 1.379(2)   |
| N1   | C2               | 1.3140(19) | C19  | C18  | 1.3959(19) |
| N11  | C12              | 1.3081(19) | C7   | C6   | 1.407(2)   |

<sup>1</sup>1-X,2-Y,-Z

**Table S10.** Bond Angles for **3**.

| Atom             | Atom | Atom             | Angle/°     | Atom | Atom | Atom | Angle/°    |
|------------------|------|------------------|-------------|------|------|------|------------|
| C11              | Tc1  | C11 <sup>1</sup> | 180.0       | N1   | C9   | C4   | 111.13(13) |
| C11 <sup>1</sup> | Tc1  | C12 <sup>1</sup> | 88.657(12)  | C8   | C9   | C4   | 121.49(14) |
| C11 <sup>1</sup> | Tc1  | C12              | 91.343(12)  | C7   | C8   | C9   | 117.11(14) |
| C11              | Tc1  | C12              | 88.657(12)  | C15  | C14  | S13  | 128.85(11) |
| C11              | Tc1  | C12 <sup>1</sup> | 91.343(12)  | C15  | C14  | C19  | 121.09(12) |
| C12 <sup>1</sup> | Tc1  | C12              | 180.0       | C19  | C14  | S13  | 110.01(10) |
| C13 <sup>1</sup> | Tc1  | C11 <sup>1</sup> | 90.001(12)  | C16  | C15  | C14  | 117.27(14) |
| C13              | Tc1  | C11 <sup>1</sup> | 89.999(12)  | C15  | C16  | C17  | 121.46(14) |
| C13              | Tc1  | C11              | 90.001(12)  | C18  | C17  | C16  | 121.31(13) |
| C13 <sup>1</sup> | Tc1  | C11              | 89.998(12)  | C6   | C5   | C4   | 117.53(13) |
| C13              | Tc1  | C12              | 89.828(12)  | C9   | C4   | S3   | 110.25(11) |
| C13              | Tc1  | C12 <sup>1</sup> | 90.171(12)  | C5   | C4   | S3   | 128.73(11) |
| C13 <sup>1</sup> | Tc1  | C12 <sup>1</sup> | 89.829(12)  | C5   | C4   | C9   | 121.02(13) |
| C13 <sup>1</sup> | Tc1  | C12              | 90.172(12)  | N1   | C2   | S3   | 113.66(12) |
| C13 <sup>1</sup> | Tc1  | C13              | 180.000(17) | N11  | C19  | C14  | 111.53(12) |
| C12              | S13  | C14              | 90.31(7)    | N11  | C19  | C18  | 126.99(14) |
| C2               | S3   | C4               | 90.45(7)    | C18  | C19  | C14  | 121.46(13) |
| C2               | N1   | C9               | 114.51(13)  | C17  | C18  | C19  | 117.38(14) |
| C12              | N11  | C19              | 114.11(13)  | C8   | C7   | C6   | 121.38(14) |
| N11              | C12  | S13              | 113.99(11)  | C5   | C6   | C7   | 121.47(14) |
| N1               | C9   | C8               | 127.38(13)  |      |      |      |            |

<sup>1</sup>1-X,<sup>2</sup>2-Y,-Z**Table S11.** Hydrogen Bonds for **3**.

| D   | H   | A                | d(D-H)/Å  | d(H-A)/Å  | d(D-A)/Å   | D-H-A/°   |
|-----|-----|------------------|-----------|-----------|------------|-----------|
| O1  | H1A | C14 <sup>1</sup> | 0.83(2)   | 2.34(2)   | 3.1683(14) | 178(2)    |
| O1  | H1B | C14              | 0.83(2)   | 2.35(2)   | 3.1738(14) | 173(2)    |
| O2  | H2A | C14 <sup>2</sup> | 0.80(2)   | 2.48(2)   | 3.2141(13) | 153(2)    |
| O2  | H2B | O1               | 0.79(2)   | 1.88(2)   | 2.6732(18) | 173(2)    |
| N1  | H1  | C14              | 0.877(18) | 2.213(18) | 3.0736(13) | 166.8(16) |
| N11 | H11 | O2               | 0.861(18) | 1.803(19) | 2.6577(17) | 171.3(17) |
| C12 | H12 | C12 <sup>3</sup> | 0.95      | 2.74      | 3.3970(15) | 127.1     |
| C2  | H2  | C12 <sup>4</sup> | 0.95      | 2.72      | 3.3435(16) | 124.0     |
| C2  | H2  | O2 <sup>2</sup>  | 0.95      | 2.56      | 3.291(2)   | 134.4     |

<sup>1</sup>2-X,<sup>2</sup>2-Y,1-Z; <sup>2</sup>1-X,<sup>2</sup>2-Y,1-Z; <sup>3</sup>1+X,+Y,+Z; <sup>4</sup>+X,+Y,1+Z**Table S12.** Torsion Angles for **3**.

| A | B | C | D | Angle/° | A | B | C | D | Angle/° |
|---|---|---|---|---------|---|---|---|---|---------|
|---|---|---|---|---------|---|---|---|---|---------|

|         |         |         |         |             |         |         |         |         |             |
|---------|---------|---------|---------|-------------|---------|---------|---------|---------|-------------|
| S1<br>3 | C1<br>4 | C1<br>5 | C1<br>6 | 175.74(11)  | C1<br>4 | C1<br>5 | C1<br>6 | C1<br>7 | 0.7(2)      |
| S1<br>3 | C1<br>4 | C1<br>9 | N1<br>1 | 2.29(14)    | C1<br>4 | C1<br>9 | C1<br>8 | C1<br>7 | 0.1(2)      |
| S1<br>3 | C1<br>4 | C1<br>9 | C1<br>8 | -176.56(11) | C1<br>5 | C1<br>4 | C1<br>9 | N1<br>1 | -179.96(12) |
| N1      | C9      | C8      | C7      | -179.85(14) | C1<br>5 | C1<br>4 | C1<br>9 | C1<br>8 | 1.2(2)      |
| N1      | C9      | C4      | S3      | 0.02(14)    | C1<br>5 | C1<br>6 | C1<br>7 | C1<br>8 | 0.5(2)      |
| N1      | C9      | C4      | C5      | 179.95(12)  | C1<br>6 | C1<br>7 | C1<br>8 | C1<br>9 | -0.9(2)     |
| N1<br>1 | C1<br>9 | C1<br>8 | C1<br>7 | -178.60(13) | C4      | S3      | C2      | N1      | 0.14(12)    |
| C1<br>2 | S1<br>3 | C1<br>4 | C1<br>5 | -179.36(13) | C4      | C9      | C8      | C7      | -0.5(2)     |
| C1<br>2 | S1<br>3 | C1<br>4 | C1<br>9 | -1.84(10)   | C4      | C5      | C6      | C7      | -0.3(2)     |
| C1<br>2 | N1<br>1 | C1<br>9 | C1<br>4 | -1.66(17)   | C2      | S3      | C4      | C9      | -0.09(11)   |
| C1<br>2 | N1<br>1 | C1<br>9 | C1<br>8 | 177.11(13)  | C2      | S3      | C4      | C5      | 179.98(13)  |
| C9      | N1      | C2      | S3      | -0.16(16)   | C2      | N1      | C9      | C8      | 179.51(15)  |
| C9      | C8      | C7      | C6      | 0.1(2)      | C2      | N1      | C9      | C4      | 0.09(17)    |
| C8      | C9      | C4      | S3      | -179.45(11) | C1<br>9 | N1<br>1 | C1<br>2 | S1<br>3 | 0.21(16)    |
| C8      | C9      | C4      | C5      | 0.5(2)      | C1<br>9 | C1<br>4 | C1<br>5 | C1<br>6 | -1.5(2)     |
| C8      | C7      | C6      | C5      | 0.3(2)      | C6      | C5      | C4      | S3      | 179.82(11)  |
| C1<br>4 | S1<br>3 | C1<br>2 | N1<br>1 | 0.96(11)    | C6      | C5      | C4      | C9      | -0.1(2)     |

**Table S13.** Bond Lengths for **4**.

| Atom | Atom             | Length/Å  | Atom | Atom | Length/Å |
|------|------------------|-----------|------|------|----------|
| Tc1  | Cl1              | 2.3728(6) | N3   | C2   | 1.311(4) |
| Tc1  | Cl1 <sup>1</sup> | 2.3728(6) | N3   | C4   | 1.387(3) |
| Tc1  | Cl2 <sup>1</sup> | 2.3539(6) | C4   | C5   | 1.395(4) |
| Tc1  | Cl2              | 2.3539(6) | C4   | C9   | 1.398(4) |
| Tc1  | Cl3              | 2.3283(7) | C5   | C6   | 1.390(4) |
| Tc1  | Cl3 <sup>1</sup> | 2.3283(7) | C6   | C7   | 1.396(4) |
| S1   | C2               | 1.692(3)  | C7   | C8   | 1.378(4) |
| S1   | C9               | 1.745(3)  | C8   | C9   | 1.403(4) |

<sup>1</sup>2-X,1-Y,1-Z

**Table S14.** Bond Angles for **4**.

| Atom             | Atom | Atom             | Angle/°  | Atom | Atom | Atom             | Angle/°    |
|------------------|------|------------------|----------|------|------|------------------|------------|
| C11              | Tc1  | C11 <sup>1</sup> | 180.0    | C13  | Tc1  | C13 <sup>1</sup> | 180.0      |
| C12              | Tc1  | C11              | 90.78(2) | C2   | S1   | C9               | 90.27(14)  |
| C12              | Tc1  | C11 <sup>1</sup> | 89.22(2) | C2   | N3   | C4               | 114.6(2)   |
| C12 <sup>1</sup> | Tc1  | C11 <sup>1</sup> | 90.78(2) | N3   | C2   | S1               | 113.8(2)   |
| C12 <sup>1</sup> | Tc1  | C11              | 89.22(2) | N3   | C4   | C5               | 127.5(2)   |
| C12              | Tc1  | C12 <sup>1</sup> | 180.0    | N3   | C4   | C9               | 111.0(2)   |
| C13              | Tc1  | C11              | 89.30(2) | C5   | C4   | C9               | 121.5(2)   |
| C13 <sup>1</sup> | Tc1  | C11              | 90.70(2) | C6   | C5   | C4               | 117.0(3)   |
| C13 <sup>1</sup> | Tc1  | C11 <sup>1</sup> | 89.30(2) | C5   | C6   | C7               | 121.3(3)   |
| C13              | Tc1  | C11 <sup>1</sup> | 90.70(2) | C8   | C7   | C6               | 122.2(3)   |
| C13              | Tc1  | C12              | 89.50(2) | C7   | C8   | C9               | 116.9(3)   |
| C13 <sup>1</sup> | Tc1  | C12 <sup>1</sup> | 89.50(2) | C4   | C9   | S1               | 110.29(19) |
| C13 <sup>1</sup> | Tc1  | C12              | 90.50(2) | C4   | C9   | C8               | 121.1(3)   |
| C13              | Tc1  | C12 <sup>1</sup> | 90.50(2) | C8   | C9   | S1               | 128.6(2)   |

<sup>1</sup>2-X,1-Y,1-Z**Table S15.** Hydrogen Bonds for **4**.

| D   | H    | A   | d(D-H)/Å  | d(H-A)/Å | d(D-A)/Å | D-H-A/° |
|-----|------|-----|-----------|----------|----------|---------|
| O1W | H1WB | C11 | 0.799(17) | 2.49(2)  | 3.259(2) | 162(3)  |
| N3  | H3   | O1W | 0.80(3)   | 1.91(3)  | 2.711(3) | 176(3)  |

**Table S16.** Torsion Angles for **4**.

| A  | B  | C  | D  | Angle/°   | A  | B  | C  | D  | Angle/°     |
|----|----|----|----|-----------|----|----|----|----|-------------|
| N3 | C4 | C5 | C6 | 179.9(2)  | C5 | C4 | C9 | S1 | 179.15(18)  |
| N3 | C4 | C9 | S1 | -0.3(2)   | C5 | C4 | C9 | C8 | -0.5(3)     |
| N3 | C4 | C9 | C8 | -179.9(2) | C5 | C6 | C7 | C8 | 0.1(4)      |
| C2 | S1 | C9 | C4 | 0.07(18)  | C6 | C7 | C8 | C9 | 0.0(4)      |
| C2 | S1 | C9 | C8 | 179.7(2)  | C7 | C8 | C9 | S1 | -179.41(19) |
| C2 | N3 | C4 | C5 | -179.0(2) | C7 | C8 | C9 | C4 | 0.2(3)      |
| C2 | N3 | C4 | C9 | 0.4(3)    | C9 | S1 | C2 | N3 | 0.2(2)      |
| C4 | N3 | C2 | S1 | -0.4(3)   | C9 | C4 | C5 | C6 | 0.6(3)      |
| C4 | C5 | C6 | C7 | -0.4(4)   |    |    |    |    |             |

**Table S17.** Bond Lengths for **5**.

| Atom | Atom | Length/Å  | Atom | Atom | Length/Å |
|------|------|-----------|------|------|----------|
| Tc1  | Cl11 | 2.3668(4) | N16  | C30  | 1.332(2) |
| Tc1  | Cl12 | 2.3523(4) | N16  | C31  | 1.327(2) |
| Tc1  | Cl13 | 2.3485(4) | N17  | C33  | 1.328(2) |
| Tc1  | Cl14 | 2.3503(4) | N17  | C36  | 1.338(2) |
| Tc1  | Cl15 | 2.3505(4) | N18  | C34  | 1.337(2) |

|     |      |           |     |     |          |
|-----|------|-----------|-----|-----|----------|
| Tc1 | Cl16 | 2.3641(4) | N18 | C35 | 1.335(2) |
| Tc2 | Cl21 | 2.3658(4) | N19 | C37 | 1.329(2) |
| Tc2 | Cl22 | 2.3564(4) | N19 | C40 | 1.334(2) |
| Tc2 | Cl23 | 2.3531(4) | N20 | C38 | 1.330(2) |
| Tc2 | Cl24 | 2.3448(4) | N20 | C39 | 1.337(2) |
| Tc2 | Cl25 | 2.3438(4) | N21 | C41 | 1.327(2) |
| Tc2 | Cl26 | 2.3647(4) | N21 | C44 | 1.337(2) |
| N1  | C1   | 1.330(2)  | N22 | C42 | 1.333(2) |
| N1  | C4   | 1.336(2)  | N22 | C43 | 1.335(2) |
| N2  | C2   | 1.336(2)  | N23 | C45 | 1.332(2) |
| N2  | C3   | 1.342(2)  | N23 | C48 | 1.325(2) |
| N3  | C5   | 1.332(2)  | N24 | C46 | 1.333(2) |
| N3  | C8   | 1.333(2)  | N24 | C47 | 1.331(2) |
| N4  | C6   | 1.337(2)  | C1  | C2  | 1.377(2) |
| N4  | C7   | 1.338(2)  | C3  | C4  | 1.378(2) |
| N5  | C9   | 1.328(2)  | C5  | C6  | 1.382(3) |
| N5  | C12  | 1.332(2)  | C7  | C8  | 1.379(2) |
| N6  | C10  | 1.331(2)  | C9  | C10 | 1.382(2) |
| N6  | C11  | 1.333(2)  | C11 | C12 | 1.380(3) |
| N7  | C13  | 1.332(2)  | C13 | C14 | 1.386(2) |
| N7  | C16  | 1.325(2)  | C15 | C16 | 1.382(2) |
| N8  | C14  | 1.331(2)  | C17 | C18 | 1.384(2) |
| N8  | C15  | 1.333(2)  | C19 | C20 | 1.376(2) |
| N9  | C17  | 1.333(2)  | C21 | C22 | 1.385(2) |
| N9  | C20  | 1.339(2)  | C23 | C24 | 1.374(2) |
| N10 | C18  | 1.331(2)  | C25 | C26 | 1.383(2) |
| N10 | C19  | 1.340(2)  | C27 | C28 | 1.377(2) |
| N11 | C21  | 1.328(2)  | C29 | C30 | 1.379(3) |
| N11 | C24  | 1.330(2)  | C31 | C32 | 1.387(2) |
| N12 | C22  | 1.334(2)  | C33 | C34 | 1.385(2) |
| N12 | C23  | 1.339(2)  | C35 | C36 | 1.379(2) |
| N13 | C25  | 1.326(2)  | C37 | C38 | 1.384(2) |
| N13 | C28  | 1.332(2)  | C39 | C40 | 1.378(2) |
| N14 | C26  | 1.328(2)  | C41 | C42 | 1.385(2) |
| N14 | C27  | 1.340(2)  | C43 | C44 | 1.376(2) |
| N15 | C29  | 1.326(2)  | C45 | C46 | 1.381(2) |
| N15 | C32  | 1.324(2)  | C47 | C48 | 1.387(2) |

**Table S18.** Bond Angles for **5**.

| Atom | Atom | Atom | Angle/°    | Atom | Atom | Atom | Angle/°    |
|------|------|------|------------|------|------|------|------------|
| Cl12 | Tc1  | Cl11 | 90.398(14) | C42  | N22  | C43  | 117.07(14) |
| Cl12 | Tc1  | Cl16 | 88.765(13) | C48  | N23  | C45  | 121.83(15) |
| Cl13 | Tc1  | Cl11 | 88.847(13) | C47  | N24  | C46  | 117.44(14) |

|      |     |      |             |     |     |     |            |
|------|-----|------|-------------|-----|-----|-----|------------|
| C113 | Tc1 | C112 | 90.669(14)  | N1  | C1  | C2  | 118.57(15) |
| C113 | Tc1 | C114 | 89.450(14)  | N2  | C2  | C1  | 122.61(15) |
| C113 | Tc1 | C115 | 177.378(14) | N2  | C3  | C4  | 122.52(15) |
| C113 | Tc1 | C116 | 91.388(13)  | N1  | C4  | C3  | 118.35(15) |
| C114 | Tc1 | C111 | 92.050(14)  | N3  | C5  | C6  | 118.21(16) |
| C114 | Tc1 | C112 | 177.551(14) | N4  | C6  | C5  | 122.65(16) |
| C114 | Tc1 | C115 | 89.875(14)  | N4  | C7  | C8  | 122.13(15) |
| C114 | Tc1 | C116 | 88.786(13)  | N3  | C8  | C7  | 118.78(15) |
| C115 | Tc1 | C111 | 88.646(13)  | N5  | C9  | C10 | 118.16(16) |
| C115 | Tc1 | C112 | 90.115(14)  | N6  | C10 | C9  | 122.60(16) |
| C115 | Tc1 | C116 | 91.130(13)  | N6  | C11 | C12 | 122.70(17) |
| C116 | Tc1 | C111 | 179.134(15) | N5  | C12 | C11 | 118.04(16) |
| C122 | Tc2 | C121 | 91.080(14)  | N7  | C13 | C14 | 117.83(15) |
| C122 | Tc2 | C126 | 89.472(14)  | N8  | C14 | C13 | 122.43(15) |
| C123 | Tc2 | C121 | 88.706(14)  | N8  | C15 | C16 | 122.46(16) |
| C123 | Tc2 | C122 | 89.985(14)  | N7  | C16 | C15 | 118.17(15) |
| C123 | Tc2 | C126 | 91.153(14)  | N9  | C17 | C18 | 118.08(14) |
| C124 | Tc2 | C121 | 90.643(14)  | N10 | C18 | C17 | 122.52(15) |
| C124 | Tc2 | C122 | 178.270(14) | N10 | C19 | C20 | 122.28(15) |
| C124 | Tc2 | C123 | 90.212(14)  | N9  | C20 | C19 | 118.33(15) |
| C124 | Tc2 | C126 | 88.806(14)  | N11 | C21 | C22 | 118.19(15) |
| C125 | Tc2 | C121 | 88.798(14)  | N12 | C22 | C21 | 122.37(16) |
| C125 | Tc2 | C122 | 89.599(14)  | N12 | C23 | C24 | 122.66(16) |
| C125 | Tc2 | C123 | 177.462(14) | N11 | C24 | C23 | 118.26(15) |
| C125 | Tc2 | C124 | 90.279(14)  | N13 | C25 | C26 | 118.30(15) |
| C125 | Tc2 | C126 | 91.346(14)  | N14 | C26 | C25 | 122.15(16) |
| C126 | Tc2 | C121 | 179.431(15) | N14 | C27 | C28 | 122.13(16) |
| C1   | N1  | C4   | 121.26(15)  | N13 | C28 | C27 | 118.17(15) |
| C2   | N2  | C3   | 116.68(15)  | N15 | C29 | C30 | 118.24(18) |
| C5   | N3  | C8   | 121.26(15)  | N16 | C30 | C29 | 122.47(18) |
| C6   | N4  | C7   | 116.96(15)  | N16 | C31 | C32 | 122.28(17) |
| C9   | N5  | C12  | 121.61(15)  | N15 | C32 | C31 | 118.21(17) |
| C10  | N6  | C11  | 116.88(16)  | N17 | C33 | C34 | 118.12(15) |
| C16  | N7  | C13  | 121.94(15)  | N18 | C34 | C33 | 122.41(15) |
| C14  | N8  | C15  | 117.16(15)  | N18 | C35 | C36 | 122.58(16) |
| C17  | N9  | C20  | 121.51(14)  | N17 | C36 | C35 | 118.07(16) |
| C18  | N10 | C19  | 117.28(14)  | N19 | C37 | C38 | 117.91(16) |
| C21  | N11 | C24  | 121.65(14)  | N20 | C38 | C37 | 122.39(16) |
| C22  | N12 | C23  | 116.79(14)  | N20 | C39 | C40 | 122.36(16) |
| C25  | N13 | C28  | 121.79(14)  | N19 | C40 | C39 | 117.96(16) |
| C26  | N14 | C27  | 117.46(14)  | N21 | C41 | C42 | 118.26(15) |
| C32  | N15 | C29  | 121.68(16)  | N22 | C42 | C41 | 122.40(15) |
| C31  | N16 | C30  | 117.13(16)  | N22 | C43 | C44 | 122.51(15) |

|     |     |     |            |     |     |     |            |
|-----|-----|-----|------------|-----|-----|-----|------------|
| C33 | N17 | C36 | 121.74(15) | N21 | C44 | C43 | 118.32(15) |
| C35 | N18 | C34 | 117.07(14) | N23 | C45 | C46 | 118.19(16) |
| C37 | N19 | C40 | 122.02(15) | N24 | C46 | C45 | 122.19(16) |
| C38 | N20 | C39 | 117.37(15) | N24 | C47 | C48 | 122.22(16) |
| C41 | N21 | C44 | 121.43(14) | N23 | C48 | C47 | 118.11(15) |

**Table S19.** Hydrogen Bonds for **5**.

| <b>D</b> | <b>H</b> | <b>A</b> | <b>d(D-H)/Å</b> | <b>d(H-A)/Å</b> | <b>d(D-A)/Å</b> | <b>D-H-A/°</b> |
|----------|----------|----------|-----------------|-----------------|-----------------|----------------|
| O1W      | H1A      | C11      | 0.789(15)       | 2.297(17)       | 3.0572(14)      | 162(2)         |
| O1W      | H1B      | C12      | 0.828(15)       | 2.461(17)       | 3.2502(14)      | 160(2)         |
| O2W      | H2A      | C17      | 0.879(16)       | 2.350(16)       | 3.1927(17)      | 161(2)         |
| O2W      | H2B      | C14      | 0.891(16)       | 2.287(16)       | 3.1593(16)      | 166(2)         |
| O3W      | H3A      | C12      | 0.801(14)       | 2.344(16)       | 3.1135(13)      | 161(2)         |
| O3W      | H3B      | C11      | 0.822(14)       | 2.469(16)       | 3.2528(14)      | 159.7(19)      |
| N1       | H1       | O1W      | 0.88            | 1.80            | 2.6743(19)      | 170.1          |
| N3       | H3       | O3W      | 0.88            | 1.83            | 2.6931(19)      | 164.9          |
| N5       | H5       | C11      | 0.88            | 2.16            | 3.0196(15)      | 165.7          |
| N7       | H7       | C12      | 0.88            | 2.17            | 3.0112(14)      | 159.4          |
| N9       | H9       | C13      | 0.88            | 2.59            | 3.2138(13)      | 128.2          |
| N9       | H9       | C14      | 0.88            | 2.43            | 3.1282(14)      | 137.1          |
| N11      | H11      | C13      | 0.88            | 2.41            | 3.1009(14)      | 135.4          |
| N11      | H11      | C14      | 0.88            | 2.68            | 3.3277(14)      | 131.7          |
| N13      | H13      | C13      | 0.88            | 2.16            | 3.0100(14)      | 161.4          |
| N15      | H15      | C15      | 0.88            | 2.12            | 2.9697(15)      | 162.1          |
| N17      | H17      | C17      | 0.88            | 2.55            | 3.2463(15)      | 136.7          |
| N17      | H17      | C18      | 0.88            | 2.54            | 3.1845(14)      | 130.5          |
| N19      | H19      | C18      | 0.88            | 2.16            | 3.0182(14)      | 165.1          |
| N21      | H21      | C17      | 0.88            | 2.41            | 3.1217(14)      | 137.8          |
| N21      | H21      | C18      | 0.88            | 2.66            | 3.2794(14)      | 128.5          |
| N23      | H23      | C16      | 0.88            | 2.18            | 2.9922(14)      | 153.9          |

**Table S20.** Torsion Angles for **5**.

| <b>A</b> | <b>B</b> | <b>C</b> | <b>D</b> | <b>Angle/°</b> | <b>A</b> | <b>B</b> | <b>C</b> | <b>D</b> | <b>Angle/°</b> |
|----------|----------|----------|----------|----------------|----------|----------|----------|----------|----------------|
| N1       | C1       | C2       | N2       | 0.7(3)         | C13      | N7       | C16      | C15      | -0.3(2)        |
| N2       | C3       | C4       | N1       | 0.1(2)         | C14      | N8       | C15      | C16      | 0.3(2)         |
| N3       | C5       | C6       | N4       | -0.5(3)        | C15      | N8       | C14      | C13      | 0.3(2)         |
| N4       | C7       | C8       | N3       | -0.9(3)        | C16      | N7       | C13      | C14      | 0.8(2)         |
| N5       | C9       | C10      | N6       | -0.6(3)        | C17      | N9       | C20      | C19      | -1.0(2)        |
| N6       | C11      | C12      | N5       | -0.1(3)        | C18      | N10      | C19      | C20      | -0.4(2)        |
| N7       | C13      | C14      | N8       | -0.8(2)        | C19      | N10      | C18      | C17      | 0.0(2)         |
| N8       | C15      | C16      | N7       | -0.3(2)        | C20      | N9       | C17      | C18      | 0.5(2)         |
| N9       | C17      | C18      | N10      | 0.0(2)         | C21      | N11      | C24      | C23      | 2.5(2)         |
| N10      | C19      | C20      | N9       | 0.9(2)         | C22      | N12      | C23      | C24      | -1.8(2)        |
| N11      | C21      | C22      | N12      | 0.5(3)         | C23      | N12      | C22      | C21      | 1.6(2)         |



|     |     |     |     |         |     |     |     |     |         |
|-----|-----|-----|-----|---------|-----|-----|-----|-----|---------|
| N12 | C23 | C24 | N11 | -0.2(3) | C24 | N11 | C21 | C22 | -2.7(2) |
| N13 | C25 | C26 | N14 | 0.2(2)  | C25 | N13 | C28 | C27 | -0.8(2) |
| N14 | C27 | C28 | N13 | 0.1(2)  | C26 | N14 | C27 | C28 | 0.7(2)  |
| N15 | C29 | C30 | N16 | 0.1(3)  | C27 | N14 | C26 | C25 | -0.9(2) |
| N16 | C31 | C32 | N15 | 0.6(3)  | C28 | N13 | C25 | C26 | 0.6(2)  |
| N17 | C33 | C34 | N18 | 0.5(3)  | C29 | N15 | C32 | C31 | -0.8(2) |
| N18 | C35 | C36 | N17 | 0.1(3)  | C30 | N16 | C31 | C32 | -0.1(3) |
| N19 | C37 | C38 | N20 | 0.0(2)  | C31 | N16 | C30 | C29 | -0.3(3) |
| N20 | C39 | C40 | N19 | 0.5(3)  | C32 | N15 | C29 | C30 | 0.5(3)  |
| N21 | C41 | C42 | N22 | 0.6(2)  | C33 | N17 | C36 | C35 | 1.2(2)  |
| N22 | C43 | C44 | N21 | 1.2(3)  | C34 | N18 | C35 | C36 | -1.0(2) |
| N23 | C45 | C46 | N24 | 0.8(3)  | C35 | N18 | C34 | C33 | 0.7(2)  |
| N24 | C47 | C48 | N23 | -0.6(2) | C36 | N17 | C33 | C34 | -1.5(2) |
| C1  | N1  | C4  | C3  | 0.1(2)  | C37 | N19 | C40 | C39 | -1.0(2) |
| C2  | N2  | C3  | C4  | 0.2(2)  | C38 | N20 | C39 | C40 | 0.2(3)  |
| C3  | N2  | C2  | C1  | -0.6(2) | C39 | N20 | C38 | C37 | -0.4(2) |
| C4  | N1  | C1  | C2  | -0.5(2) | C40 | N19 | C37 | C38 | 0.7(2)  |
| C5  | N3  | C8  | C7  | 0.6(2)  | C41 | N21 | C44 | C43 | -1.1(2) |
| C6  | N4  | C7  | C8  | 0.4(3)  | C42 | N22 | C43 | C44 | -0.4(2) |
| C7  | N4  | C6  | C5  | 0.2(3)  | C43 | N22 | C42 | C41 | -0.6(2) |
| C8  | N3  | C5  | C6  | 0.0(2)  | C44 | N21 | C41 | C42 | 0.3(2)  |
| C9  | N5  | C12 | C11 | -0.7(2) | C45 | N23 | C48 | C47 | 0.3(2)  |
| C10 | N6  | C11 | C12 | 0.6(3)  | C46 | N24 | C47 | C48 | 1.0(2)  |
| C11 | N6  | C10 | C9  | -0.2(3) | C47 | N24 | C46 | C45 | -1.0(2) |
| C12 | N5  | C9  | C10 | 1.0(2)  | C48 | N23 | C45 | C46 | -0.4(2) |

**Table S21.** Bond Lengths for 6.

| Atom | Atom             | Length/Å  | Atom | Atom | Length/Å |
|------|------------------|-----------|------|------|----------|
| Tc1  | Br3 <sup>1</sup> | 2.4932(6) | N1   | C2   | 1.339(7) |
| Tc1  | Br3              | 2.4933(6) | N2   | C7   | 1.327(8) |
| Tc1  | Br1 <sup>1</sup> | 2.5258(7) | C4   | C3   | 1.385(8) |
| Tc1  | Br1              | 2.5258(7) | C4   | C5   | 1.375(8) |
| Tc1  | Br2              | 2.5103(7) | C3   | C7   | 1.498(8) |
| Tc1  | Br2 <sup>1</sup> | 2.5103(7) | C3   | C2   | 1.376(8) |
| O1   | C7               | 1.239(7)  | C5   | C6   | 1.377(9) |
| N1   | C6               | 1.328(8)  |      |      |          |

<sup>1</sup>1-X,1-Y,1-Z

**Table S22.** Bond Angles for 6.

| Atom             | Atom | Atom             | Angle/°    | Atom             | Atom | Atom | Angle/°   |
|------------------|------|------------------|------------|------------------|------|------|-----------|
| Br3 <sup>1</sup> | Tc1  | Br3              | 180.0      | Br2 <sup>1</sup> | Tc1  | Br1  | 90.12(2)  |
| Br3              | Tc1  | Br1 <sup>1</sup> | 89.536(19) | Br2 <sup>1</sup> | Tc1  | Br2  | 180.00(3) |

|                  |     |                  |            |    |    |    |          |
|------------------|-----|------------------|------------|----|----|----|----------|
| Br3 <sup>1</sup> | Tc1 | Br1              | 89.536(19) | C6 | N1 | C2 | 123.4(6) |
| Br3 <sup>1</sup> | Tc1 | Br1 <sup>1</sup> | 90.465(19) | C5 | C4 | C3 | 120.0(6) |
| Br3              | Tc1 | Br1              | 90.464(19) | C4 | C3 | C7 | 120.5(5) |
| Br3 <sup>1</sup> | Tc1 | Br2 <sup>1</sup> | 90.56(2)   | C2 | C3 | C4 | 118.9(5) |
| Br3              | Tc1 | Br2              | 90.56(2)   | C2 | C3 | C7 | 120.3(6) |
| Br3              | Tc1 | Br2 <sup>1</sup> | 89.44(2)   | C4 | C5 | C6 | 119.3(6) |
| Br3 <sup>1</sup> | Tc1 | Br2              | 89.44(2)   | O1 | C7 | N2 | 124.5(6) |
| Br1              | Tc1 | Br1 <sup>1</sup> | 180.0      | O1 | C7 | C3 | 118.2(6) |
| Br2              | Tc1 | Br1 <sup>1</sup> | 90.12(2)   | N2 | C7 | C3 | 117.3(6) |
| Br2 <sup>1</sup> | Tc1 | Br1 <sup>1</sup> | 89.88(2)   | N1 | C6 | C5 | 119.2(6) |
| Br2              | Tc1 | Br1              | 89.88(2)   | N1 | C2 | C3 | 119.2(6) |

<sup>1</sup>1-X,1-Y,1-Z

**Table S23.** Hydrogen Bonds for 6.

| D  | H  | A               | d(D-H)/Å | d(H-A)/Å | d(D-A)/Å | D-H-A/° |
|----|----|-----------------|----------|----------|----------|---------|
| N1 | H1 | O1 <sup>1</sup> | 0.83(4)  | 1.85(4)  | 2.671(7) | 173(7)  |
| C4 | H4 | O1 <sup>2</sup> | 0.95     | 2.61     | 3.225(7) | 123.2   |

<sup>1</sup>-1/2+X,3/2-Y,-1/2+Z; <sup>2</sup>2-X,2-Y,1-Z

**Table S24.** Torsion Angles for 6.

| A  | B  | C  | D  | Angle/°   | A  | B  | C  | D  | Angle/°   |
|----|----|----|----|-----------|----|----|----|----|-----------|
| C4 | C3 | C7 | O1 | 23.5(9)   | C5 | C4 | C3 | C2 | -2.6(9)   |
| C4 | C3 | C7 | N2 | -154.5(6) | C7 | C3 | C2 | N1 | 174.7(5)  |
| C4 | C3 | C2 | N1 | 1.6(9)    | C6 | N1 | C2 | C3 | -0.5(9)   |
| C4 | C5 | C6 | N1 | -1.4(9)   | C2 | N1 | C6 | C5 | 0.4(9)    |
| C3 | C4 | C5 | C6 | 2.5(10)   | C2 | C3 | C7 | O1 | -149.5(6) |
| C5 | C4 | C3 | C7 | -175.8(6) | C2 | C3 | C7 | N2 | 32.5(9)   |

**Table S25.** Bond Lengths for 7.

| Atom | Atom             | Length/Å  | Atom | Atom | Length/Å  |
|------|------------------|-----------|------|------|-----------|
| Tc1  | Br1              | 2.5073(2) | Tc1  | Br3  | 2.5145(2) |
| Tc1  | Br1 <sup>1</sup> | 2.5073(2) | N1   | C1   | 1.500(3)  |
| Tc1  | Br2              | 2.5149(2) | N1   | C3   | 1.495(3)  |
| Tc1  | Br2 <sup>1</sup> | 2.5149(2) | C1   | C2   | 1.519(3)  |
| Tc1  | Br3 <sup>1</sup> | 2.5145(2) | C3   | C4   | 1.515(3)  |

<sup>1</sup>1-X,1-Y,1-Z

**Table S26.** Bond Angles for 7.

| Atom | Atom | Atom             | Angle/° | Atom             | Atom | Atom | Angle/° |
|------|------|------------------|---------|------------------|------|------|---------|
| Br1  | Tc1  | Br1 <sup>1</sup> | 180.0   | Br2 <sup>1</sup> | Tc1  | Br2  | 180.0   |

|                  |     |                  |           |                  |     |                  |            |
|------------------|-----|------------------|-----------|------------------|-----|------------------|------------|
| Br1 <sup>1</sup> | Tc1 | Br2              | 90.988(8) | Br3 <sup>1</sup> | Tc1 | Br2 <sup>1</sup> | 90.400(8)  |
| Br1              | Tc1 | Br2              | 89.012(8) | Br3              | Tc1 | Br2              | 90.400(8)  |
| Br1 <sup>1</sup> | Tc1 | Br2 <sup>1</sup> | 89.012(8) | Br3              | Tc1 | Br2 <sup>1</sup> | 89.600(8)  |
| Br1              | Tc1 | Br2 <sup>1</sup> | 90.988(8) | Br3 <sup>1</sup> | Tc1 | Br2              | 89.600(8)  |
| Br1              | Tc1 | Br3              | 90.211(8) | Br3              | Tc1 | Br3 <sup>1</sup> | 180.0      |
| Br1 <sup>1</sup> | Tc1 | Br3              | 89.789(8) | C3               | N1  | C1               | 115.17(18) |
| Br1 <sup>1</sup> | Tc1 | Br3 <sup>1</sup> | 90.211(8) | N1               | C1  | C2               | 109.6(2)   |
| Br1              | Tc1 | Br3 <sup>1</sup> | 89.789(9) | N1               | C3  | C4               | 110.5(2)   |

<sup>1</sup>1-X,1-Y,1-Z

**Table S27.** Hydrogen Bonds for 7.

| D  | H   | A                | d(D-H)/Å | d(H-A)/Å | d(D-A)/Å | D-H-A/° |
|----|-----|------------------|----------|----------|----------|---------|
| N1 | H1A | Br3 <sup>1</sup> | 0.92(3)  | 2.62(3)  | 3.491(2) | 157(2)  |
| N1 | H1B | Br1              | 0.84(3)  | 2.65(3)  | 3.407(2) | 150(2)  |
| N1 | H1B | Br2 <sup>2</sup> | 0.84(3)  | 2.82(3)  | 3.413(2) | 129(2)  |
| C1 | H1D | Br2 <sup>1</sup> | 0.99     | 3.07     | 3.740(2) | 126.3   |
| C4 | H4B | Br1 <sup>1</sup> | 0.98     | 3.07     | 3.766(3) | 128.8   |

<sup>1</sup>3/2-X,1/2+Y,3/2-Z; <sup>2</sup>1-X,1-Y,1-Z

**Table S28.** Torsion Angles for 7.

| A  | B  | C  | D  | Angle/°   | A  | B  | C  | D  | Angle/°    |
|----|----|----|----|-----------|----|----|----|----|------------|
| C1 | N1 | C3 | C4 | -174.4(2) | C3 | N1 | C1 | C2 | 176.71(19) |

**Table S29.** Bond Lengths for 8.

| Atom | Atom             | Length/Å  | Atom | Atom             | Length/Å  |
|------|------------------|-----------|------|------------------|-----------|
| Tc1  | Cl1 <sup>1</sup> | 2.3586(4) | Tc1  | Cl3 <sup>1</sup> | 2.3562(4) |
| Tc1  | Cl1              | 2.3586(4) | N1   | C3               | 1.497(2)  |
| Tc1  | Cl2              | 2.3499(4) | N1   | C1               | 1.499(2)  |
| Tc1  | Cl2 <sup>1</sup> | 2.3499(4) | C3   | C4               | 1.507(3)  |
| Tc1  | Cl3              | 2.3562(4) | C1   | C2               | 1.509(2)  |

<sup>1</sup>1-X,1-Y,1-Z

**Table S30.** Bond Angles for 8.

| Atom             | Atom | Atom             | Angle/°    | Atom             | Atom | Atom             | Angle/°    |
|------------------|------|------------------|------------|------------------|------|------------------|------------|
| Cl1              | Tc1  | Cl1 <sup>1</sup> | 180.0      | Cl2 <sup>1</sup> | Tc1  | Cl3              | 89.907(17) |
| Cl2              | Tc1  | Cl1              | 90.164(16) | Cl3 <sup>1</sup> | Tc1  | Cl1              | 89.987(15) |
| Cl2 <sup>1</sup> | Tc1  | Cl1              | 89.836(15) | Cl3              | Tc1  | Cl1 <sup>1</sup> | 89.986(16) |
| Cl2 <sup>1</sup> | Tc1  | Cl1 <sup>1</sup> | 90.163(15) | Cl3              | Tc1  | Cl1              | 90.013(15) |
| Cl2              | Tc1  | Cl1 <sup>1</sup> | 89.837(15) | Cl3 <sup>1</sup> | Tc1  | Cl1 <sup>1</sup> | 90.014(16) |
| Cl2              | Tc1  | Cl2 <sup>1</sup> | 180.0      | Cl3 <sup>1</sup> | Tc1  | Cl3              | 180.0      |

|                  |     |                  |            |  |    |    |    |            |
|------------------|-----|------------------|------------|--|----|----|----|------------|
| Cl2              | Tc1 | Cl3 <sup>1</sup> | 89.907(17) |  | C3 | N1 | C1 | 114.35(14) |
| Cl2              | Tc1 | Cl3              | 90.093(17) |  | N1 | C3 | C4 | 110.05(16) |
| Cl2 <sup>1</sup> | Tc1 | Cl3 <sup>1</sup> | 90.093(17) |  | N1 | C1 | C2 | 109.55(15) |

<sup>1</sup>1-X,1-Y,1-Z

**Table S31.** Hydrogen Bonds for **8**.

| D  | H   | A                | d(D-H)/Å | d(H-A)/Å | d(D-A)/Å   | D-H-A/°   |
|----|-----|------------------|----------|----------|------------|-----------|
| N1 | H1A | Cl3 <sup>1</sup> | 0.89(2)  | 2.48(2)  | 3.3353(16) | 160.8(17) |
| N1 | H1B | C11              | 0.93(2)  | 2.66(2)  | 3.3179(16) | 128.9(16) |
| N1 | H1B | Cl2              | 0.93(2)  | 2.48(2)  | 3.3172(15) | 150.0(17) |

<sup>1</sup>1/2+X,3/2-Y,1/2+Z

**Table S32.** Torsion Angles for **8**.

| A  | B  | C  | D  | Angle/°    | A  | B  | C  | D  | Angle/°     |
|----|----|----|----|------------|----|----|----|----|-------------|
| C3 | N1 | C1 | C2 | 177.82(15) | C1 | N1 | C3 | C4 | -178.26(15) |

**Table S33.** Parameters of  $\pi$ -stacking interactions.

| Structure | Rings                  | Angle                                        | Centroid-centroid distance | Shift distance |       |
|-----------|------------------------|----------------------------------------------|----------------------------|----------------|-------|
| <b>2</b>  | C4N3C2N1C6C5<br>5      | C4N3C2N1C6C5<br>(symmetry code: 1-X,1-Y,2-Z) | 0.000                      | 3.677          | 1.550 |
| <b>3</b>  | C14C19C18C17<br>C16C15 | C4C5C6C7C8C9<br>(symmetry code: 2-X,1-Y,1-Z) | 6.601                      | 3.650          | 0.976 |
|           |                        | C2S3C4C9N1<br>(symmetry code: 1-X,1-Y,1-Z)   | 6.337                      | 3.660          | 1.619 |
|           |                        | C2S3C4C9N1<br>(symmetry code: 2-X,1-Y,1-Z)   | 6.337                      | 3.640          | 1.366 |
|           | C12S13C14C19<br>N11    | C4C5C6C7C8C9<br>(symmetry code: 2-X,1-Y,1-Z) | 9.055                      | 3.857          | 1.516 |
| <b>4</b>  | C9C8C7C6C5C4<br>4      | C9C8C7C6C5C4<br>(symmetry code: 1-           | 0.000                      | 3.587          | 1.073 |

|  |  |                                              |       |       |       |
|--|--|----------------------------------------------|-------|-------|-------|
|  |  | X,-Y,-Z)                                     |       |       |       |
|  |  | C2S1C9C4N3<br>(symmetry code: -<br>X,-Y,-Z)  | 0.515 | 3.754 | 1.303 |
|  |  | C2S1C9C4N3<br>(symmetry code: 1-<br>X,-Y,-Z) | 0.515 | 3.709 | 1.443 |

**Table S34.** Distances and angles of anion- $\pi$  interactions.

| Structure | Hal                                                       | $C_z$ (centroid of ring)                                  | Distance<br>Hal $\cdots C_z$ , Å | Angle $\alpha$<br>between<br>the ring<br>plane and<br>the<br>Cz $\cdots$ Hal<br>vector, ° |
|-----------|-----------------------------------------------------------|-----------------------------------------------------------|----------------------------------|-------------------------------------------------------------------------------------------|
| 1         | Br4                                                       | N1C2N3C4C5C6                                              | 3.82                             | 68.2                                                                                      |
|           | Br6                                                       | N21C22N23C24C25C26                                        | 3.41                             | 73.5                                                                                      |
|           |                                                           | C4C5N7C8C9                                                | 3.31                             | 84.7                                                                                      |
| 2         | Cl2                                                       | N1C2N3C4C5C6 (symmetry<br>code: 1-X,1-Y,1-Z)              | 3.63                             | 62.6                                                                                      |
|           | Cl1                                                       | C4C5N7C8N9 (symmetry<br>code: 1-X,1-Y,1-Z)                | 3.46                             | 81.4                                                                                      |
| 5         | Cl16                                                      | N15C29C30N16C31C32<br>(symmetry code: X,3/2-Y,-<br>1/2+Z) | 3.34                             | 80.7                                                                                      |
|           |                                                           | N14C27C28N13C25C26                                        | 3.28                             | 84.0                                                                                      |
|           | Cl11                                                      | N23C45C46N24C47C48<br>(symmetry code: X,1+Y,Z)            | 3.51                             | 83.55                                                                                     |
|           | Cl21                                                      | N15C29C30N16C31C32                                        | 3.49                             | 84.87                                                                                     |
|           |                                                           | N14C27C28N13C25C26<br>(symmetry code: X,1/2-<br>Y,1/2+Z)  | 3.76                             | 71.3                                                                                      |
| Cl26      | N19C37C38N20C39C40<br>(symmetry code: X,1/2-Y,-<br>1/2+Z) | 3.54                                                      | 77.4                             |                                                                                           |
| 6         | Br3                                                       | N1C2C3C4C5C6 (symmetry<br>code: 3/2-X,-1/2+Y,1/2-Z)       | 3.65                             | 70.3                                                                                      |
|           | Br1                                                       | N1C2C3C4C5C6 (symmetry<br>code: 1-X,1-Y,1-Z)              | 3.83                             | 72.0                                                                                      |

**Table S35.** Presence of  $\text{TcHal}_6$  structures in ICSD.

|                      | $\text{TcF}_6$ | $\text{TcCl}_6$ | $\text{TcBr}_6$ | $\text{TcI}_6$ |
|----------------------|----------------|-----------------|-----------------|----------------|
| Na                   | +              |                 |                 |                |
| $\text{NH}_4$        | +              | +               |                 |                |
| K                    | +              | +               |                 | +              |
| Rb                   | +              |                 |                 |                |
| Cs                   | +              |                 |                 |                |
| $\text{H}_3\text{O}$ |                |                 | +               | +              |

### 3. Solubility of some $\text{Tc}(\text{Hal})_6^{2-}$ compounds

**Table S36.** Technetium concentrations in saturated solutions of hexahalide compounds.

| Solvent <sup>T°</sup>                   | Concentration of technetium in solution, mg/L* |          |                           |                           |          |           |
|-----------------------------------------|------------------------------------------------|----------|---------------------------|---------------------------|----------|-----------|
|                                         | <b>3</b>                                       | <b>4</b> | $\text{K}_2\text{TcCl}_6$ | $\text{K}_2\text{TcBr}_6$ | <b>7</b> | <b>13</b> |
| Acrylonitrile <sup>6</sup>              |                                                |          |                           |                           | 490      |           |
| n-propanol <sup>23</sup>                | <10                                            | <10      |                           |                           |          | 20        |
| n-heptanol <sup>23</sup>                | <10                                            | <10      |                           |                           |          | <10       |
| n-Octanol <sup>23</sup>                 | <10                                            | <10      |                           |                           |          | <10       |
| Decanol <sup>23</sup>                   | <10                                            | <10      |                           |                           |          | <10       |
| $\text{CH}_2\text{Cl}_2$ <sup>6</sup>   |                                                |          | <10                       | 140                       |          | <10       |
| $\text{CH}_2\text{Cl}_2$ <sup>-28</sup> |                                                |          | <10                       | 30                        |          |           |
| $\text{H}_2\text{O}$ <sup>23</sup>      | 5640***                                        | 40       | 91020***                  | 58270***                  |          |           |
| $\text{H}_2\text{O}$ <sup>6</sup>       | 110                                            |          | 28236***                  | 57950***                  |          |           |
| $\text{CCl}_4$ <sup>23</sup>            |                                                | <10      |                           |                           | 70       | <10       |
| $\text{CCl}_4$ <sup>6</sup>             |                                                | <10      |                           |                           |          |           |
| $\text{CHCl}_3$ <sup>23</sup>           |                                                |          |                           |                           | 480      |           |
| $\text{CHCl}_3$ <sup>6</sup>            |                                                |          |                           |                           | 350      | <10       |
| $\text{MeOH}$ <sup>23</sup>             | 2830**                                         | 2150**   | 180                       | 920                       |          | 80        |
| $\text{MeOH}$ <sup>6</sup>              | 240                                            | 200      | 40                        | 300                       |          |           |
| $\text{MeOH}$ <sup>-28</sup>            |                                                |          | 40                        | 300                       |          |           |
| $\text{CH}_3\text{COOH}$ <sup>23</sup>  |                                                |          |                           |                           |          | 20        |

|                             |  |  |  |  |  |       |
|-----------------------------|--|--|--|--|--|-------|
| TGF <sup>23</sup>           |  |  |  |  |  | <10   |
| Acrylonitrile <sup>23</sup> |  |  |  |  |  | 620** |

\* Measurement error 5%;

\*\* The substance reacts slowly with the solvent;

\*\*\* Hydrolytic processes take place.

#### 4. Thermal analysis

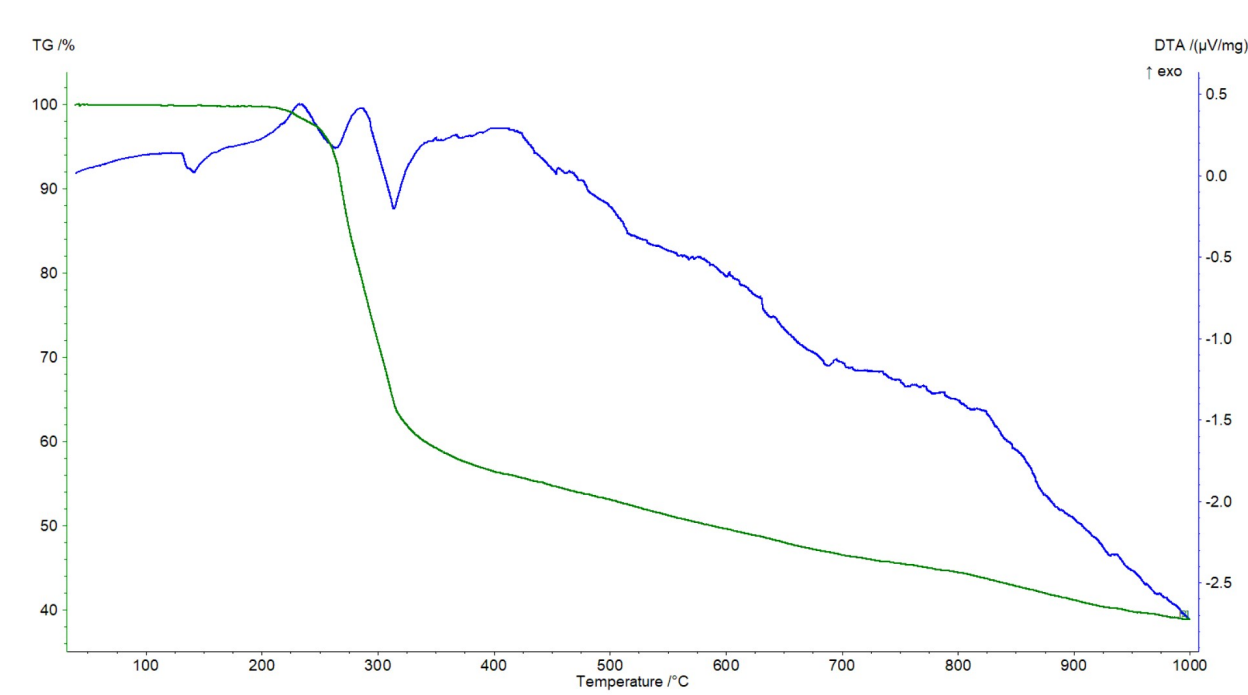

**Figure S1.** TG and DTA curves of compound 7

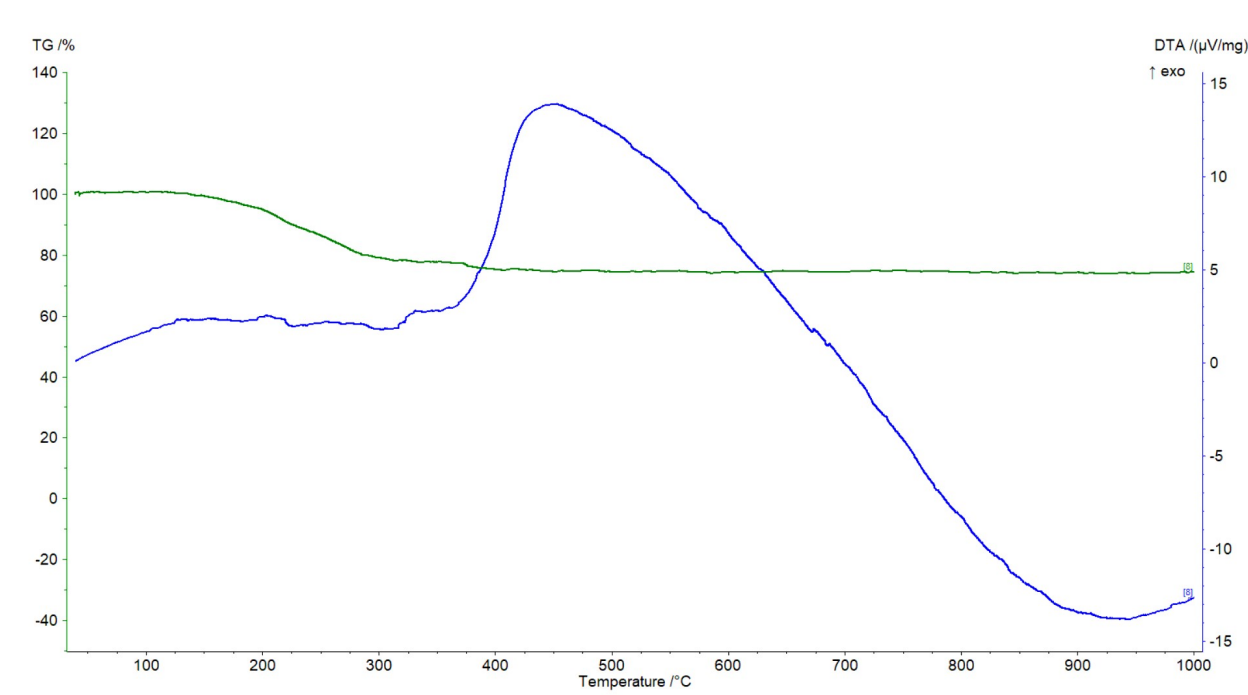

**Figure S2.** TG and DTA curves of compound 2

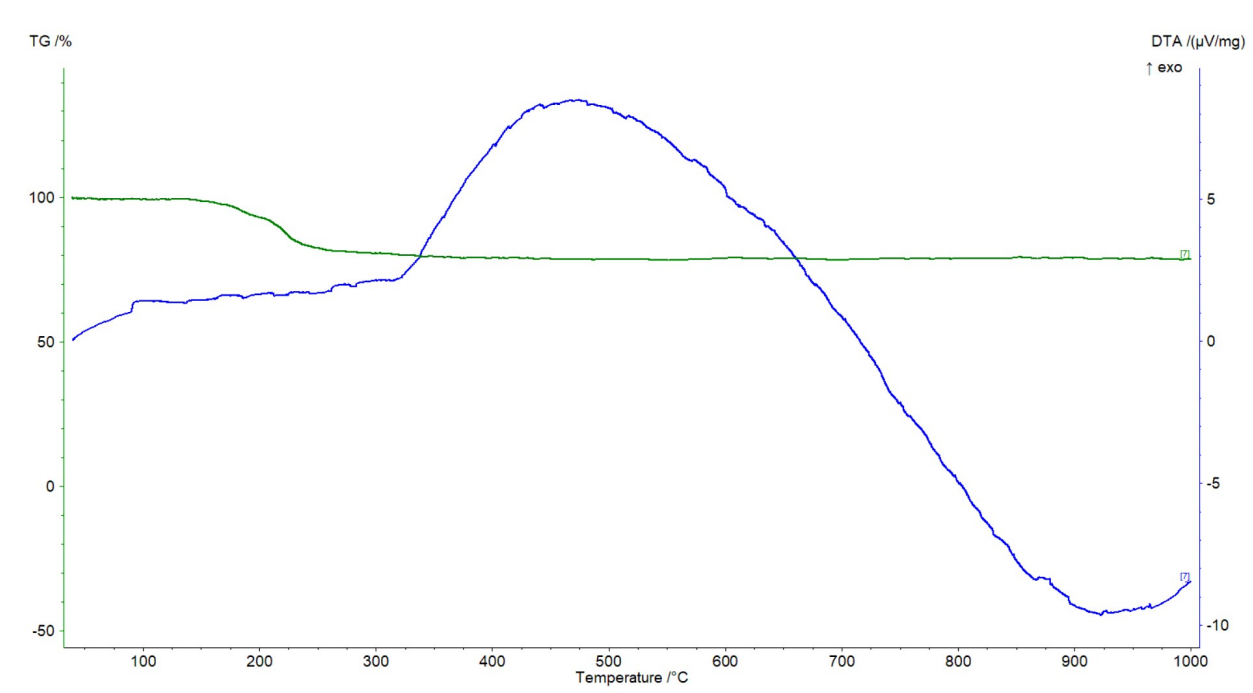

**Figure S3.** TG and DTA curves of compound 1

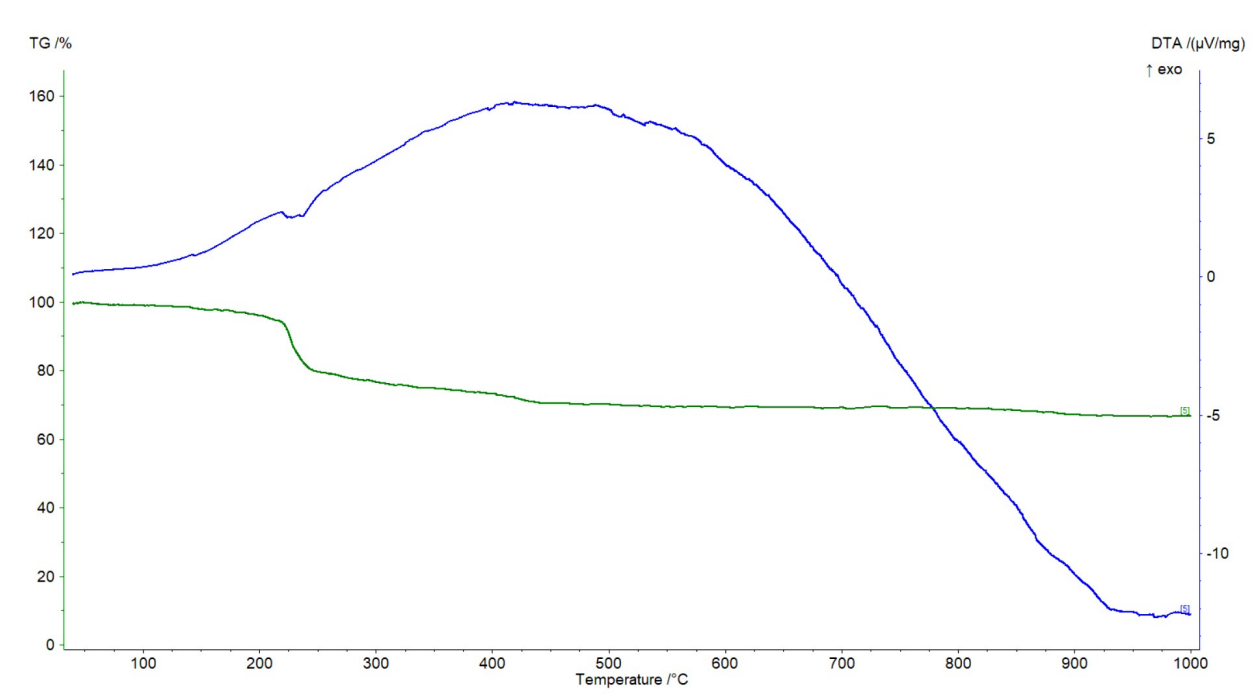

**Figure S4.** TG and DTA curves of compound 9



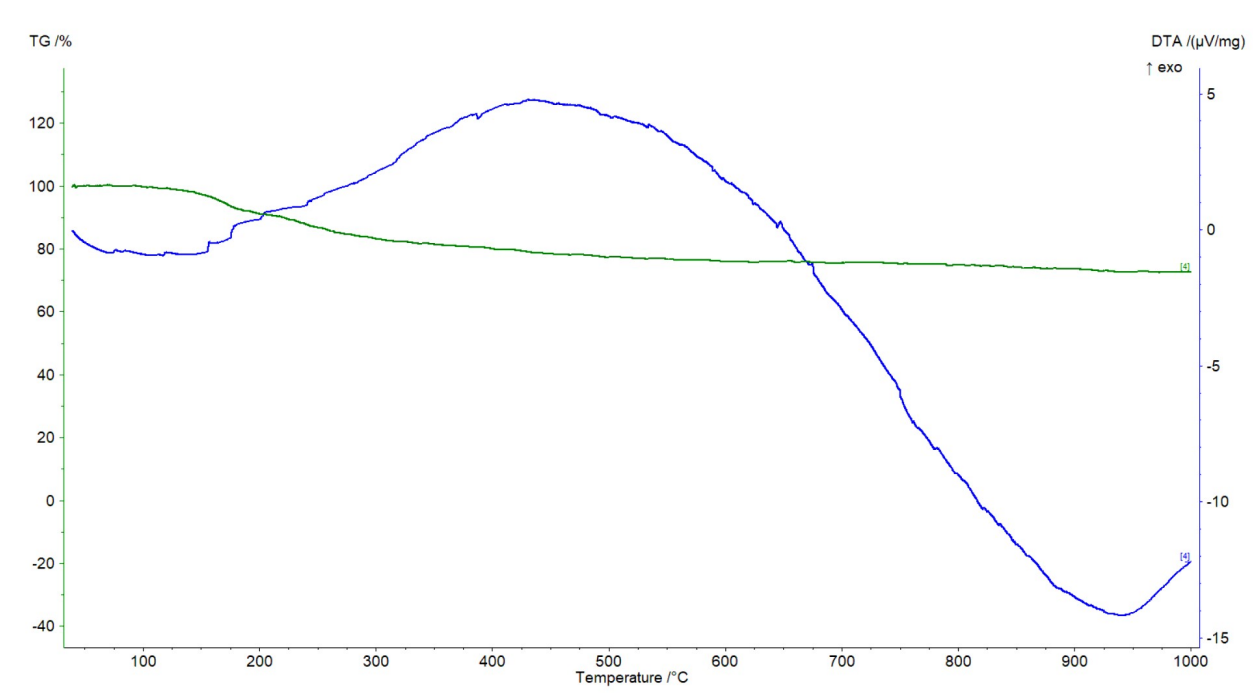

**Figure S5.** TG and DTA curves of compound **10**

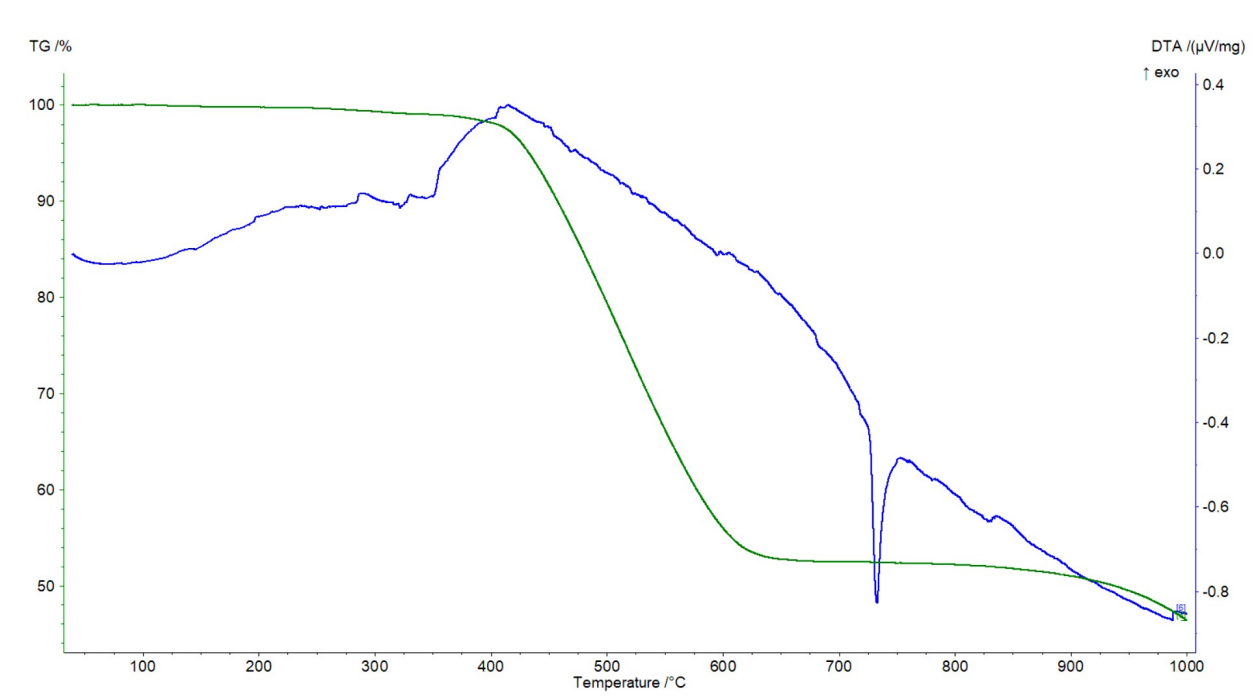

**Figure S6.** TG and DTA curves of K<sub>2</sub>TcBr<sub>6</sub>

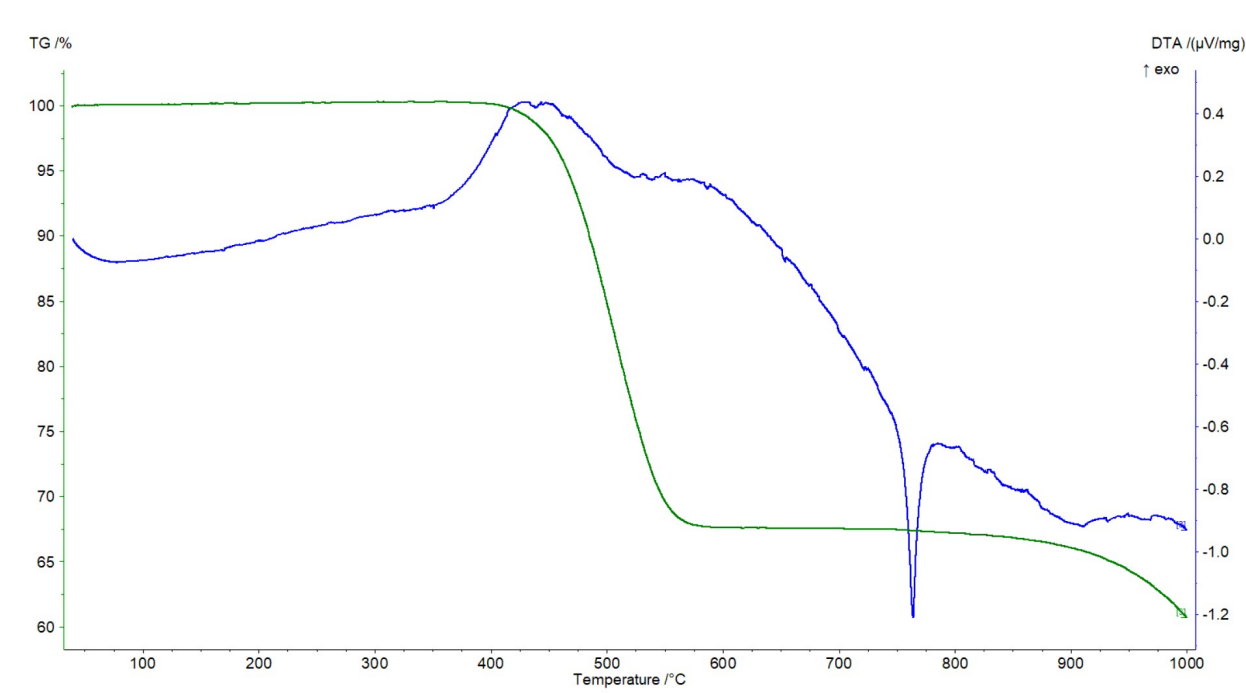

**Figure S7.** TG and DTA curves of  $K_2TcCl_6$

## 5. X-ray phase analysis of thermolysis products and some initial substances

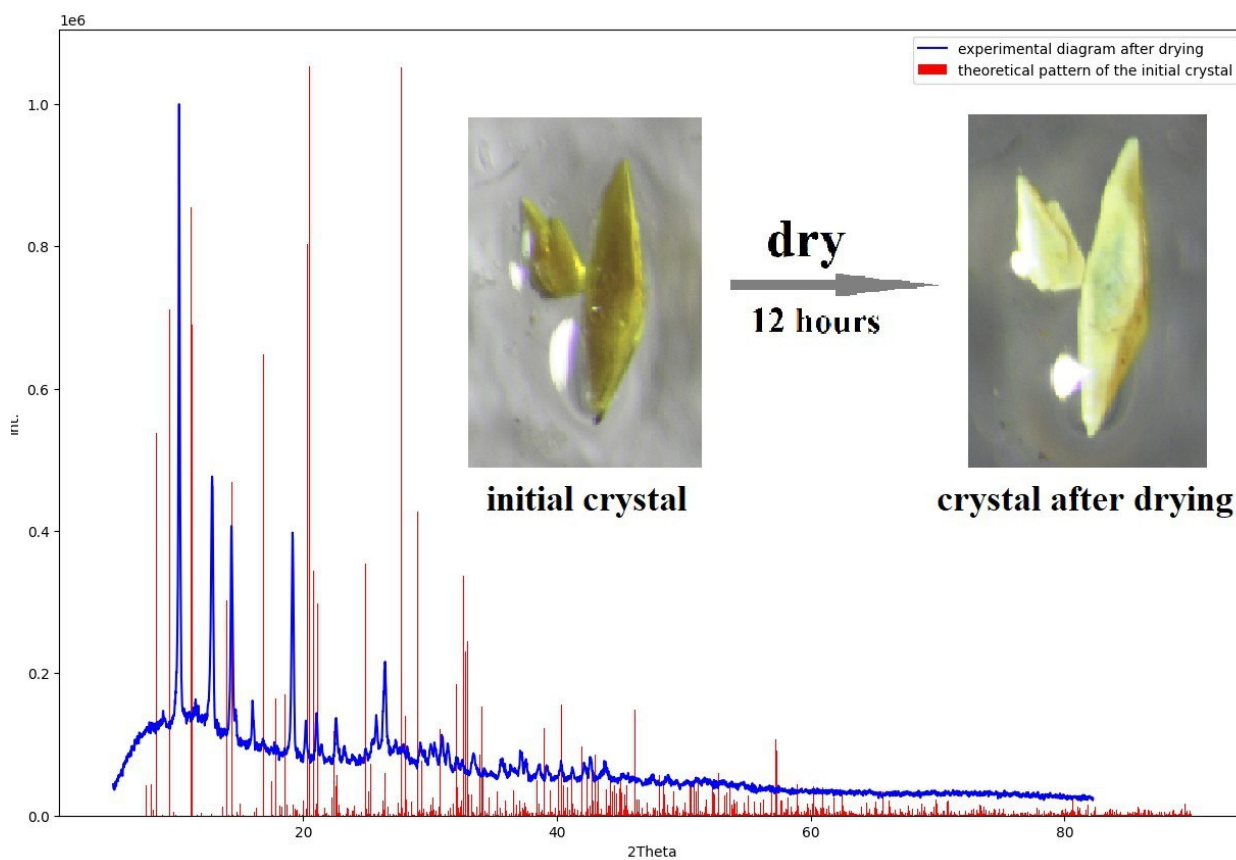

**Figure S8.** pXRD of dried compound **5** compared to the theoretical profile calculated from the structure of compound **5**

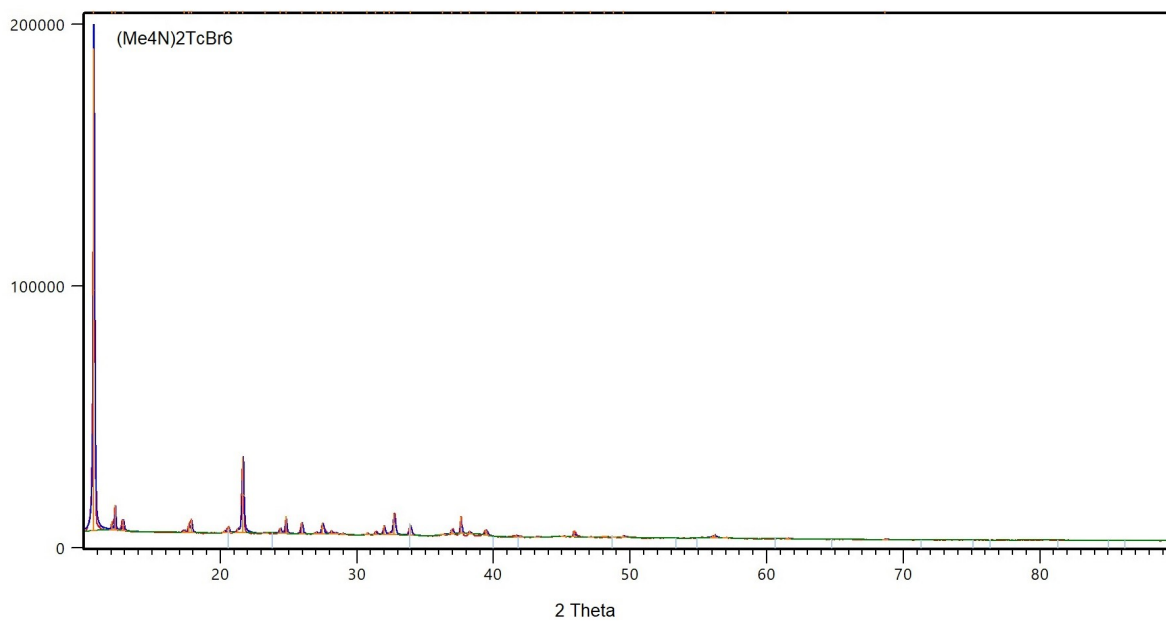

**Figure S9.** pXRD compound **13**

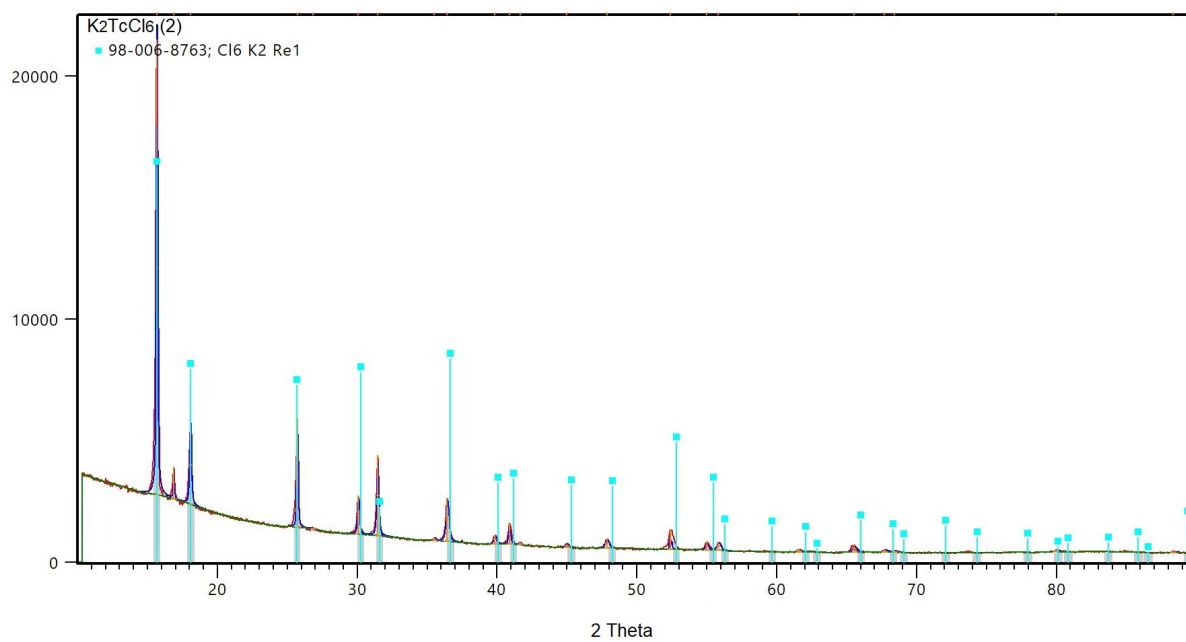

**Figure S10.** pXRD K<sub>2</sub>TcCl<sub>6</sub> with comparing to K<sub>2</sub>ReCl<sub>6</sub>

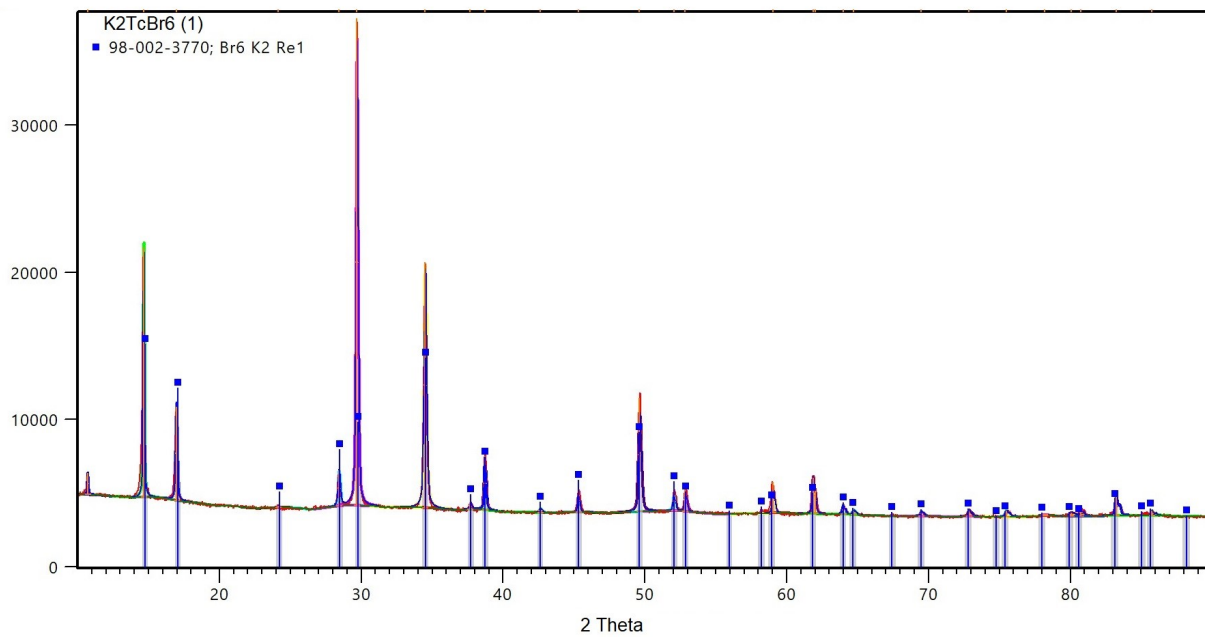

**Figure S11.** pXRD  $\text{K}_2\text{TcBr}_6$  with comparing to  $\text{K}_2\text{ReBr}_6$

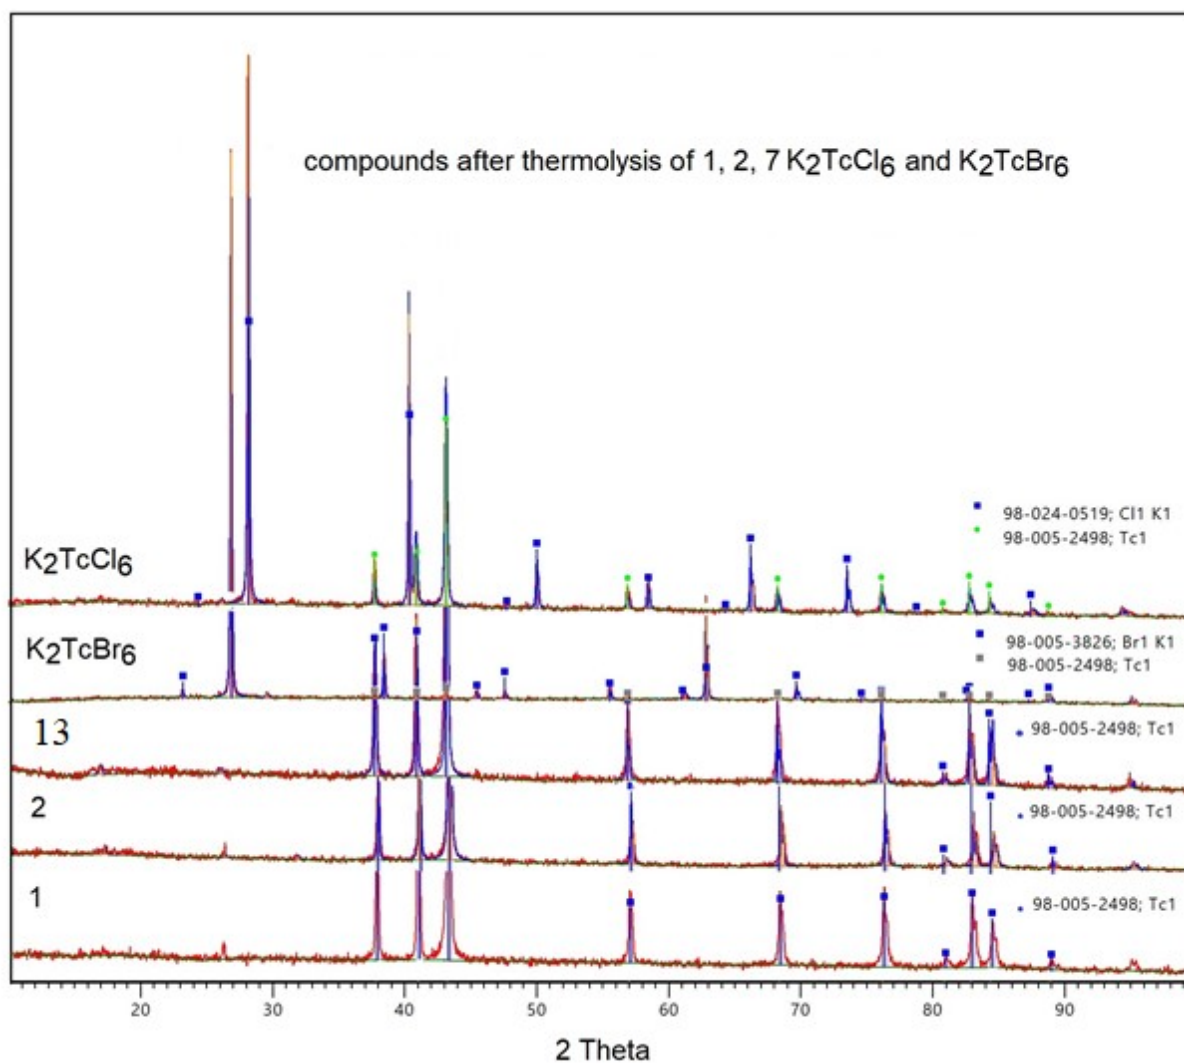

**Figure S12.** PXRD of 1, 2, 13,  $K_2TcCl_6$  and  $K_2TcBr_6$  thermolysis products

## 6. Hirshfeld surface analysis

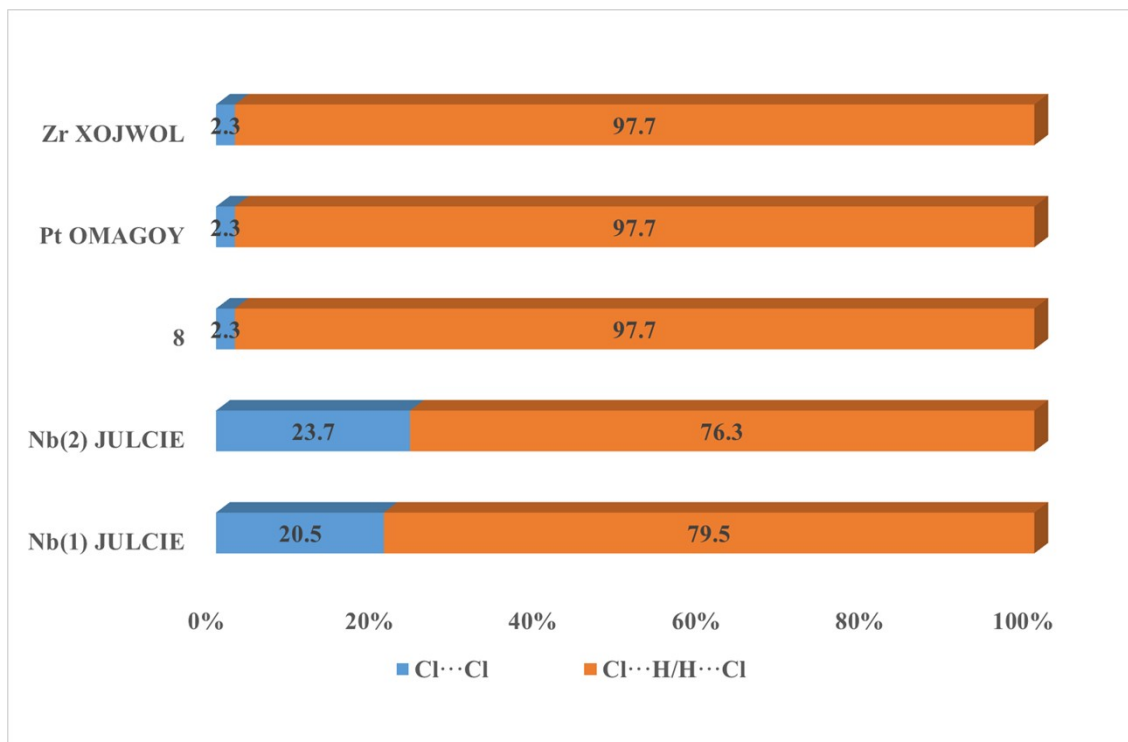

**Figure S13.** Percentage contribution of each type of non-valent interactions to the Hirshfeld surface in anions of similar octahedral structure with a transition metal ( $\text{TRCl}_6^{2-}$ ) and a diethylammonium (DEA) cation.

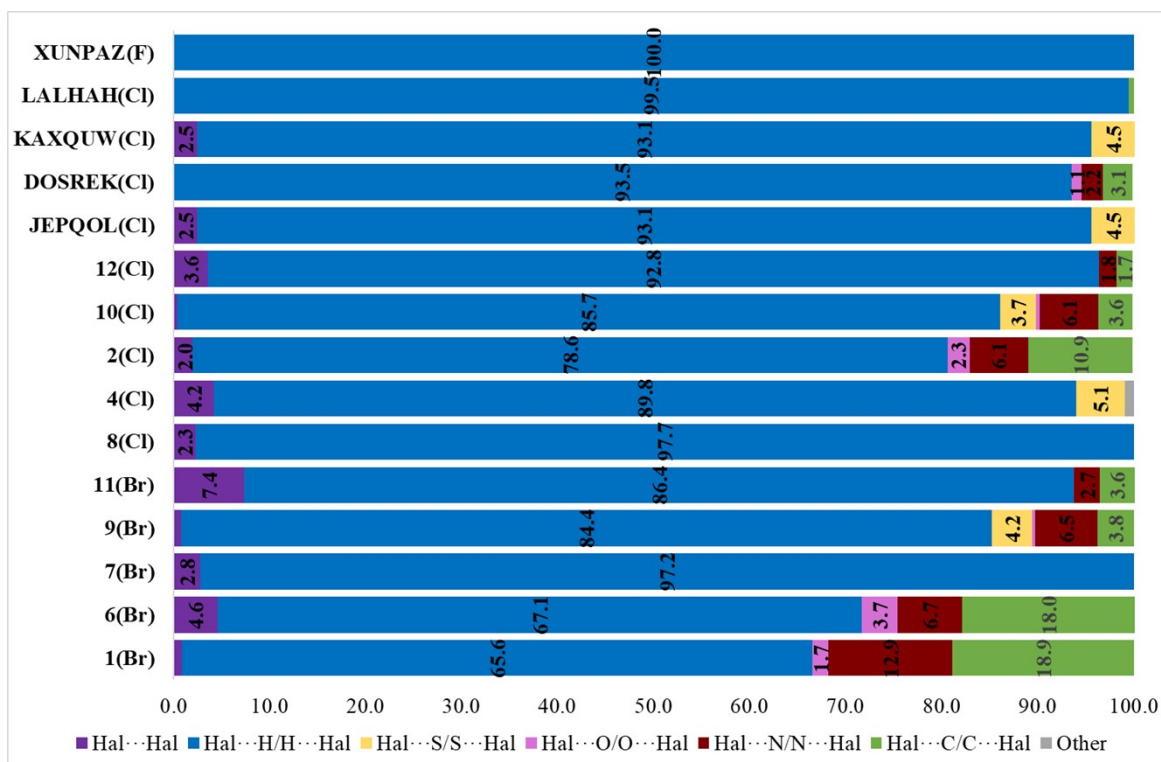

**Figure S14.** Percentage contribution of each type of non-valent interactions to the Hirshfeld surface in  $\text{TcHal}_6^{2-}$  anions, described for the first time in this work and found in the CSD.

**Table S37.** Two-dimensional fingerprint plots for cations of 1- 7.

| Structure  | Interactions                                                                        |                                                                                     |                                                                                      |                                                                                       |
|------------|-------------------------------------------------------------------------------------|-------------------------------------------------------------------------------------|--------------------------------------------------------------------------------------|---------------------------------------------------------------------------------------|
| 1 (Cat. 1) | 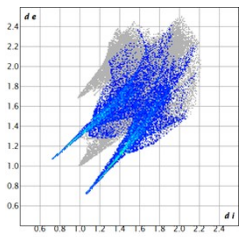   |    |    |    |
|            | <i>O...H/H...O</i>                                                                  | <i>H...H</i>                                                                        | <i>H...Br/Br...H</i>                                                                 | <i>C...Br/Br...C</i>                                                                  |
| 1 (Cat. 2) |    |    |    |    |
|            | <i>O...H/H...O</i>                                                                  | <i>H...H/H...H</i>                                                                  | <i>H...Br/Br...H</i>                                                                 | <i>C...Br/Br...C</i>                                                                  |
| 2          |   |   |   |   |
|            | <i>O...H/H...O</i>                                                                  | <i>H...H</i>                                                                        | <i>H...Cl/Cl...H</i>                                                                 | <i>C...H/H...C</i>                                                                    |
| 3 (Cat. 1) |  |  |  |  |
|            | <i>H...H</i>                                                                        | <i>C...S/S...C</i>                                                                  | <i>H...Cl/Cl...H</i>                                                                 | <i>C...H/H...C</i>                                                                    |
| 3 (Cat. 2) |  |  |  |  |
|            | <i>H...H/H...H</i>                                                                  | <i>C...C</i>                                                                        | <i>H...Cl/Cl...H</i>                                                                 | <i>C...H/H...C</i>                                                                    |
| 4          |  |  |  |  |
|            | <i>H...H</i>                                                                        | <i>C...C</i>                                                                        | <i>H...Cl/Cl...H</i>                                                                 | <i>H...S/S...H</i>                                                                    |

|   |                       |                         |                         |                         |
|---|-----------------------|-------------------------|-------------------------|-------------------------|
| 6 |                       |                         |                         |                         |
|   | $O\cdots H/H\cdots O$ | $H\cdots H$             | $H\cdots Br/Br\cdots H$ | $C\cdots Br/Br\cdots C$ |
| 7 |                       |                         |                         |                         |
|   | $H\cdots H$           | $H\cdots Br/Br\cdots H$ |                         |                         |

## References

- 1 M. A. Volkov, A. P. Novikov, M. S. Grigoriev, A. M. Fedoseev and K. E. German, *IJMS*, 2022, **23**, 9461.
- 2 A. P. Novikov, M. A. Volkov, A. V. Safonov and M. S. Grigoriev, *Crystals*, 2022, **12**, 271.
- 3 J. Chen, Q. Peng, X. Peng, H. Zhang and H. Zeng, *Chem. Rev.*, 2022, **122**, 14594–14678.
- 4 M. J. Langton, C. J. Serpell and P. D. Beer, *Angew. Chem. Int. Ed.*, 2016, **55**, 1974–1987.
- 5 M. S. Taylor, *Coordination Chemistry Reviews*, 2020, **413**, 213270.
- 6 R. Xie, N. Shen, X. Chen, J. Li, Y. Wang, C. Zhang, C. Xiao, Z. Chai and S. Wang, *Inorg. Chem.*, 2021, **60**, 6463–6471.
